# Supplementary material
Source: ML conference proceedings conference paper supplement (https://openreview.net/forum?id=6cc69ArD3O)
Supplement: supplementary_material [file attachment]

# 446 Appendix

## 447 A Proof of Proposition 1 in Section 2

448 *Proof.* We use the notation  $T|_{S(v, T+b)}(v) = (T_i v)_{i \in S(v, T+b)}$ . Assume that  $T + b$  has a DSS with  
 449 respect to every  $v \in L^2(D)^n$  in the sense of Definition 2, and that

$$\text{ReLU}(T v^{(1)} + b) = \text{ReLU}(T v^{(2)} + b) \quad \text{in } D, \quad (\text{A.1})$$

450 where  $v^{(1)}, v^{(2)} \in L^2(D)^n$ . Since  $T + b$  has a DSS with respect to  $v^{(1)}$ , we have for  $i \in S(v^{(1)}, T + b)$

$$0 < \text{ReLU}(T_i v^{(1)} + b_i) = \text{ReLU}(T_i v^{(2)} + b_i) \text{ in } D,$$

451 which implies that

$$T_i v^{(1)} + b_i = T_i v^{(2)} + b_i \text{ in } D.$$

452 Thus,

$$v^{(1)} - v^{(2)} \in \text{Ker} \left( T|_{S(v^{(1)}, T+b)} \right). \quad (\text{A.2})$$

453 By assuming (A.1), we have for  $i \notin S(v^{(1)}, T)$ ,

$$\{x \in D \mid T_i v^{(1)}(x) + b_i(x) \leq 0\} = \{x \in D \mid T_i v^{(2)}(x) + b_i(x) \leq 0\}.$$

454 Then, we have

$$T_i(v^{(1)} - v^{(2)})(x) + b_i(x) = T_i v^{(2)}(x) + b_i(x) \leq 0 \text{ if } T_i v^{(1)}(x) + b_i(x) \leq 0,$$

455 that is,

$$T_i v^{(1)}(x) + b_i(x) \leq T_i(v^{(1)} - v^{(2)})(x) \text{ if } T_i v^{(1)}(x) + b_i(x) \leq 0.$$

456 In addition,

$$T_i(v^{(1)} - v^{(2)})(x) = T_i v^{(1)}(x) + b_i(x) - (T_i v^{(2)}(x) + b_i(x)) = 0 \text{ if } T_i v^{(1)}(x) + b_i(x) > 0.$$

457 Thus,

$$v^{(1)} - v^{(2)} \in X(v, T + b). \quad (\text{A.3})$$

Combining (A.2) and (A.3), and (2.1) as  $v = v^{(1)}$ , we conclude that

$$v^{(1)} - v^{(2)} = 0.$$

458 Conversely, assume that there exists a  $v \in L^2(D)^n$  such that

$$\text{Ker} \left( T|_{S(v, T+b)} \right) \cap X(v, T + b) \neq \{0\}.$$

459 Then there is  $u \neq 0$  such that

$$u \in \text{Ker} \left( T|_{S(v, T+b)} \right) \cap X(v, T + b).$$

460 For  $i \in S(v, T + b)$ , we have by  $u \in \text{Ker}(T_i)$ ,

$$\text{ReLU}(T_i(v - u) + b_i(x)) = \text{ReLU}(T_i v + b_i(x)).$$

461 For  $i \notin S(v, T + b)$ , we have by  $u \in X(v, T + b)$ ,

$$\begin{aligned} \text{ReLU}(T_i(v - u)(x) + b_i(x)) &= \begin{cases} 0 & \text{if } T_i v(x) + b_i(x) \leq 0 \\ T_i v(x) + b_i(x) & \text{if } T_i v(x) + b_i(x) > 0 \end{cases} \\ &= \text{ReLU}(T_i v(x) + b_i(x)). \end{aligned}$$

462 Therefore, we conclude that

$$\text{ReLU}(T(v - u) + b) = \text{ReLU}(T v + b),$$

463 where  $u \neq 0$ , that is,  $\text{ReLU} \circ (T + b)$  is not injective.  $\square$

464 **B Details of Sections 3.1 and 3.2**

465 **B.1 Proof of Lemma 1**

466 *Proof.* The restriction operator,  $\pi_\ell : L^2(D)^m \rightarrow L^2(D)^\ell$  ( $\ell < m$ ), acts as follows,

$$\pi_\ell(a, b) := b, \quad (a, b) \in L^2(D)^{m-\ell} \times L^2(D)^\ell. \quad (\text{B.1})$$

467 Since  $L^2(D)$  is a separable Hilbert space, there exists an orthonormal basis  $\{\varphi_k\}_{k \in \mathbb{N}}$  in  $L^2(D)$ . We  
468 denote by

$$\varphi_{k,j}^0 := \left( 0, \dots, 0, \underbrace{\varphi_k}_{j\text{-th}}, 0, \dots, 0 \right) \in L^2(D)^m,$$

469 for  $k \in \mathbb{N}$  and  $j \in [m - \ell]$ . Then,  $\{\varphi_{k,j}^0\}_{k \in \mathbb{N}, j \in [m-\ell]}$  is an orthonormal sequence in  $L^2(D)^m$ , and

$$\begin{aligned} V_0 &:= L^2(D)^{m-\ell} \times \{0\}^\ell \\ &= \text{span} \{ \varphi_{k,j}^0 \mid k \in \mathbb{N}, j \in [m - \ell] \}. \end{aligned}$$

470 We define, for  $\alpha \in (0, 1)$ ,

$$\varphi_{k,j}^\alpha := \left( 0, \dots, 0, \underbrace{\sqrt{1-\alpha}\varphi_k}_{j\text{-th}}, 0, \dots, 0, \sqrt{\alpha}\xi_{(k-1)(m-\ell)+j} \right) \in L^2(D)^m, \quad (\text{B.2})$$

471 with  $k \in \mathbb{N}$  and  $j \in [m - \ell]$ . We note that  $\{\varphi_{k,j}^\alpha\}_{k \in \mathbb{N}, j \in [m-\ell]}$  is an orthonormal sequence in  $L^2(D)^m$ .

472 We set

$$V_\alpha := \text{span} \{ \varphi_{k,j}^\alpha \mid k \in \mathbb{N}, j \in [m - \ell] \}. \quad (\text{B.3})$$

473 It holds for  $0 < \alpha < 1/2$  that

$$\|P_{V_\alpha^\perp} - P_{V_0^\perp}\|_{\text{op}} < 1.$$

474 Indeed, for  $u \in L^2(D)^m$  and  $0 < \alpha < 1/2$ ,

$$\begin{aligned} & \left\| P_{V_\alpha^\perp} u - P_{V_0^\perp} u \right\|_{L^2(D)^m}^2 = \|P_{V_\alpha} u - P_{V_0} u\|_{L^2(D)^m}^2 \\ &= \left\| \sum_{k \in \mathbb{N}, j \in [m-\ell]} (u, \varphi_{k,j}^\alpha) \varphi_{k,j}^\alpha - (u, \varphi_{k,j}^0) \varphi_{k,j}^0 \right\|_{L^2(D)^m}^2 \\ &= \left\| \sum_{k \in \mathbb{N}, j \in [m-\ell]} (1-\alpha)(u_j, \varphi_k) \varphi_k - (u_j, \varphi_k) \varphi_k \right\|_{L^2(D)}^2 \\ &+ \left\| \sum_{k \in \mathbb{N}, j \in [m-\ell]} \alpha(u_m, \xi_{(k-1)(m-\ell)+j}) \xi_{(k-1)(m-\ell)+j} \right\|_{L^2(D)}^2 \\ &\leq \alpha^2 \sum_{j \in [m-\ell]} \sum_{k \in \mathbb{N}} |(u_j, \varphi_k)|^2 + \alpha^2 \sum_{k \in \mathbb{N}} |(u_m, \xi_k)|^2 \leq 4\alpha^2 \|u\|_{L^2(D)^m}^2, \end{aligned}$$

475 which implies that  $\|P_{V_\alpha^\perp} - P_{V_0^\perp}\|_{\text{op}} \leq 2\alpha$ .

476 We will show that the operator

$$P_{V_\alpha^\perp} \circ T : L^2(D)^n \rightarrow L^2(D)^m,$$

477 is injective. Assuming that for  $a, b \in L^2(D)^n$ ,

$$P_{V_\alpha^\perp} \circ T(a) = P_{V_\alpha^\perp} \circ T(b),$$

478 is equivalent to

$$T(a) - T(b) = P_{V_\alpha}(T(a) - T(b)).$$

479 Denoting by  $P_{V_\alpha}(T(a) - T(b)) = \sum_{k \in \mathbb{N}, j \in [m-\ell]} c_{k,j} \varphi_{k,j}^\alpha$ ,

$$\pi_1(T(a) - T(b)) = \sum_{k \in \mathbb{N}, j \in [m-\ell]} c_{k,j} \xi_{(k-1)(m-\ell)+j}.$$

480 From (3.1), we obtain that  $c_{k,j} = 0$  for all  $k, j$ . By injectivity of  $T$ , we finally get  $a = b$ .

481 We define  $Q_\alpha : L^2(D)^m \rightarrow L^2(D)^m$  by

$$Q_\alpha := \left( P_{V_0^\perp} P_{V_\alpha^\perp} + (I - P_{V_0^\perp})(I - P_{V_\alpha^\perp}) \right) \left( I - (P_{V_0^\perp} - P_{V_\alpha^\perp})^2 \right)^{-1/2}.$$

482 By the same argument as in Section I.4.6 Kato [2013], we can show that  $Q_\alpha$  is injective and

$$Q_\alpha P_{V_\alpha^\perp} = P_{V_0^\perp} Q_\alpha,$$

483 that is,  $Q_\alpha$  maps from  $\text{Ran}(P_{V_\alpha^\perp})$  to

$$\text{Ran}(P_{V_0^\perp}) \subset \{0\}^{m-\ell} \times L^2(D)^\ell.$$

484 It follows that

$$\pi_\ell \circ Q_\alpha \circ P_{V_\alpha^\perp} \circ T : L^2(D)^n \rightarrow L^2(D)^\ell$$

485 is injective. □

## 486 B.2 Remarks following Lemma 1

487 **Remark 2.** An example that satisfies (3.1) is the neural operator whose  $L$ -th layer operator  $\mathcal{L}_L$   
 488 consists of the integral operator  $K_L$  with continuous kernel function  $k_L$ , and with continuous  
 489 activation function  $\sigma$ . Indeed, in this case, we may choose the orthogonal sequence  $\{\xi_k\}_{k \in \mathbb{N}}$  in  
 490  $L^2(D)$  as a discontinuous functions sequence<sup>1</sup> so that  $\text{span}\{\xi_k\}_{k \in \mathbb{N}} \cap C(D) = \{0\}$ . Then, by  
 491  $\text{Ran}(\mathcal{L}_L) \subset C(D)^{d_L}$ , the assumption (3.1) holds.

492 **Remark 3.** In the proof of Lemma 1, an operator  $B \in \mathcal{L}(L^2(D)^m, L^2(D)^\ell)$ ,

$$B = \pi_\ell \circ Q_\alpha \circ P_{V_\alpha^\perp},$$

493 appears, where  $P_{V_\alpha^\perp}$  is the orthogonal projection onto orthogonal complement  $V_\alpha^\perp$  of  $V_\alpha$  with

$$V_\alpha := \text{span} \left\{ \varphi_{k,j}^\alpha \mid k \in \mathbb{N}, j \in [m-\ell] \right\} \subset L^2(D)^m,$$

494 in which  $\varphi_{k,j}^\alpha$  is defined for  $\alpha \in (0, 1)$ ,  $k \in \mathbb{N}$  and  $j \in [\ell]$ ,

$$\varphi_{k,j}^\alpha := \left( 0, \dots, 0, \underbrace{\sqrt{(1-\alpha)}\varphi_k}_{j\text{-th}}, 0, \dots, 0, \sqrt{\alpha}\xi_{(k-1)(m-\ell)+j} \right).$$

495 Here,  $\{\varphi_k\}_{k \in \mathbb{N}}$  is an orthonormal basis in  $L^2(D)$ . Furthermore,  $Q_\alpha : L^2(D)^m \rightarrow L^2(D)^m$  is  
 496 defined by

$$Q_\alpha := \left( P_{V_0^\perp} P_{V_\alpha^\perp} + (I - P_{V_0^\perp})(I - P_{V_\alpha^\perp}) \right) \left( I - (P_{V_0^\perp} - P_{V_\alpha^\perp})^2 \right)^{-1/2},$$

497 where  $P_{V_0^\perp}$  is the orthogonal projection onto orthogonal complement  $V_0^\perp$  of  $V_0$  with

$$V_0 := L^2(D)^{m-\ell} \times \{0\}^\ell.$$

498 The operator  $Q_\alpha$  is well-defined for  $0 < \alpha < 1/2$  because it holds that

$$\left\| P_{V_\alpha^\perp} - P_{V_0^\perp} \right\|_{\text{op}} < 2\alpha.$$

499 This construction is given by the combination of "Pairs of projections" discussed in Kato [2013,  
 500 Section I.4.6] with the idea presented in [Puthawala et al., 2022b, Lemma 29].

<sup>1</sup>e.g., step functions whose supports are disjoint for each sequence.

501 **B.3 Proof of Theorem 1**

502 We begin with

503 **Definition 3.** *The set of  $L$ -layer neural networks mapping from  $\mathbb{R}^d$  to  $\mathbb{R}^{d'}$  is*

$$\begin{aligned} \mathbb{N}_L(\sigma; \mathbb{R}^d, \mathbb{R}^{d'}) := & \left\{ f : \mathbb{R}^d \rightarrow \mathbb{R}^{d'} \mid f(x) = W_L \sigma(\cdots W_1 \sigma(W_0 x + b_0) + b_1 \cdots) + b_L, \right. \\ & \left. W_\ell \in \mathbb{R}^{d_{\ell+1} \times d_\ell}, b_\ell \in \mathbb{R}^{d_{\ell+1}}, d_\ell \in \mathbb{N}_0 (d_0 = d, d_{L+1} = d'), \ell = 0, \dots, L \right\}, \end{aligned}$$

504 *where  $\sigma : \mathbb{R} \rightarrow \mathbb{R}$  is an element-wise nonlinear activation function. For the class of nonlinear*  
 505 *activation functions,*

$$\mathbb{A}_0 := \left\{ \sigma \in C(\mathbb{R}) \mid \exists n \in \mathbb{N}_0 \text{ s.t. } \mathbb{N}_n(\sigma; \mathbb{R}^d, \mathbb{R}) \text{ is dense in } C(K) \text{ for } \forall K \subset \mathbb{R}^d \text{ compact} \right\}$$

506

$$\mathbb{A}_0^L := \left\{ \sigma \in \mathbb{A}_0 \mid \sigma \text{ is Borel measurable s.t. } \sup_{x \in \mathbb{R}} \frac{|\sigma(x)|}{1 + |x|} < \infty \right\}$$

507

$$\begin{aligned} \mathbb{B}\mathbb{A} := & \left\{ \sigma \in \mathbb{A}_0 \mid \forall K \subset \mathbb{R}^d \text{ compact}, \forall \epsilon > 0, \text{ and } \forall C \geq \text{diam}(K), \exists n \in \mathbb{N}_0, \right. \\ & \left. \exists f \in \mathbb{N}_n(\sigma; \mathbb{R}^d, \mathbb{R}^d) \text{ s.t. } |f(x) - x| \leq \epsilon, \forall x \in K, \text{ and, } |f(x)| \leq C, \forall x \in \mathbb{R}^d \right\}. \end{aligned}$$

508 *The set of integral neural operators with  $L^2$ -integral kernels is*

$$\begin{aligned} \mathbb{N}\mathbb{O}_L(\sigma; D, d_{in}, d_{out}) := & \left\{ G : L^2(D)^{d_{in}} \rightarrow L^2(D)^{d_{out}} \mid \right. \\ & G = K_{L+1} \circ (K_L + b_L) \circ \sigma \cdots \circ (K_2 + b_2) \circ \sigma \circ (K_1 + b_1) \circ (K_0 + b_0), \\ & K_\ell \in \mathcal{L}(L^2(D)^{d_\ell}, L^2(D)^{d_{\ell+1}}), K_\ell : f \mapsto \int_D k_\ell(\cdot, y) f(y) dy \Big|_D, \\ & k_\ell \in L^2(D \times D; \mathbb{R}^{d_{\ell+1} \times d_\ell}), b_\ell \in L^2(D; \mathbb{R}^{d_{\ell+1}}), \\ & \left. d_\ell \in \mathbb{N}, d_0 = d_{in}, d_{L+2} = d_{out}, \ell = 0, \dots, L + 2 \right\}. \end{aligned} \tag{B.4}$$

509 *Proof.* Let  $R > 0$  such that

$$K \subsetneq B_R(0),$$

510 where  $B_R(0) := \{u \in L^2(D)^{d_{in}} \mid \|u\|_{L^2(D)^{d_{in}}} \leq R\}$ . By Theorem 11 of Kovachki et al. [2021b],  
 511 there exists  $L \in \mathbb{N}$  and  $\tilde{G} \in \mathbb{N}\mathbb{O}_L(\sigma; D, d_{in}, d_{out})$  such that

$$\sup_{a \in K} \left\| G^+(a) - \tilde{G}(a) \right\|_{L^2(D)^{d_{out}}} \leq \frac{\epsilon}{2}, \tag{B.5}$$

512 and

$$\left\| \tilde{G}(a) \right\|_{L^2(D)^{d_{out}}} \leq 4M, \quad \text{for } a \in L^2(D)^{d_{in}}, \quad \|a\|_{L^2(D)^{d_{in}}} \leq R.$$

513 We write operator  $\tilde{G}$  by

$$\tilde{G} = \tilde{K}_{L+1} \circ (\tilde{K}_L + \tilde{b}_L) \circ \sigma \cdots \circ (\tilde{K}_2 + \tilde{b}_2) \circ \sigma \circ (\tilde{K}_1 + \tilde{b}_1) \circ (\tilde{K}_0 + \tilde{b}_0),$$

514 where

$$\begin{aligned} \tilde{K}_\ell \in & \mathcal{L}(L^2(D)^{d_\ell}, L^2(D)^{d_{\ell+1}}), \tilde{K}_\ell : f \mapsto \int_D \tilde{k}_\ell(\cdot, y) f(y) dy, \\ \tilde{k}_\ell \in & C(D \times D; \mathbb{R}^{d_{\ell+1} \times d_\ell}), \tilde{b}_\ell \in L^2(D; \mathbb{R}^{d_{\ell+1}}), \\ & d_\ell \in \mathbb{N}, d_0 = d_{in}, d_{L+2} = d_{out}, \ell = 0, \dots, L + 2. \end{aligned}$$

515 We remark that kernel functions  $\tilde{k}_\ell$  are continuous because neural operators defined in Kovachki et al.  
 516 [2021b] parameterize the integral kernel function by neural networks, thus,

$$\text{Ran}(\tilde{G}) \subset C(D)^{d_{out}}. \tag{B.6}$$

517 We define the neural operator  $H : L^2(D)^{d_{in}} \rightarrow L^2(D)^{d_{in}+d_{out}}$  by

$$H = K_{L+1} \circ (K_L + b_L) \circ \sigma \cdots \circ (K_2 + b_2) \circ \sigma \circ (K_1 + b_1) \circ (K_0 + b_0),$$

518 where  $K_\ell$  and  $b_\ell$  are defined as follows. First, we choose  $K_{inj} \in \mathcal{L}(L^2(D)^{d_{in}}, L^2(D)^{d_{in}})$  as a linear  
519 injective integral operator<sup>2</sup>.

520 (i) When  $\sigma_1 \in \mathbb{A}_0^L \cap \text{BA}$  is injective,

$$K_0 = \begin{pmatrix} K_{inj} \\ \tilde{K}_0 \end{pmatrix} \in \mathcal{L}(L^2(D)^{d_{in}}, L^2(D)^{d_{in}+d_1}), \quad b_0 = \begin{pmatrix} O \\ \tilde{b}_0 \end{pmatrix} \in L^2(D)^{d_{in}+d_1},$$

521

⋮

522

$$K_\ell = \begin{pmatrix} K_{inj} & O \\ O & \tilde{K}_\ell \end{pmatrix} \in \mathcal{L}(L^2(D)^{d_{in}+d_\ell}, L^2(D)^{d_{in}+d_{\ell+1}}), \quad b_\ell = \begin{pmatrix} O \\ \tilde{b}_\ell \end{pmatrix} \in L^2(D)^{d_{in}+d_{\ell+1}},$$

523

$$(1 \leq \ell \leq L),$$

524

⋮

525

$$K_{L+1} = \begin{pmatrix} K_{inj} & O \\ O & \tilde{K}_{L+1} \end{pmatrix} \in \mathcal{L}(L^2(D)^{d_{in}+d_{L+1}}, L^2(D)^{d_{in}+d_{out}}), \quad b_L = \begin{pmatrix} O \\ O \end{pmatrix} \in L^2(D)^{d_{in}+d_{out}}.$$

526

527 (ii) When  $\sigma_1 = \text{ReLU}$ ,

$$K_0 = \begin{pmatrix} K_{inj} \\ \tilde{K}_0 \end{pmatrix} \in \mathcal{L}(L^2(D)^{d_{in}}, L^2(D)^{d_{in}+d_1}), \quad b_0 = \begin{pmatrix} O \\ \tilde{b}_0 \end{pmatrix} \in L^2(D)^{d_{in}+d_1},$$

528

$$K_1 = \begin{pmatrix} K_{inj} & O \\ -K_{inj} & O \\ O & \tilde{K}_1 \end{pmatrix} \in \mathcal{L}(L^2(D)^{d_{in}+d_1}, L^2(D)^{2d_{in}+d_2}), \quad b_0 = \begin{pmatrix} O \\ O \\ \tilde{b}_1 \end{pmatrix} \in L^2(D)^{2d_{in}+d_1},$$

529

⋮

530

$$K_\ell = \begin{pmatrix} K_{inj} & -K_{inj} & \vdots & O \\ -K_{inj} & K_{inj} & \vdots & \tilde{K}_\ell \\ \vdots & \vdots & \ddots & \vdots \\ \vdots & \vdots & \vdots & \vdots \end{pmatrix} \in \mathcal{L}(L^2(D)^{2d_{in}+d_\ell}, L^2(D)^{2d_{in}+d_{\ell+1}}),$$

531

$$b_\ell = \begin{pmatrix} O \\ O \\ \tilde{b}_\ell \end{pmatrix} \in L^2(D)^{2d_{in}+d_{\ell+1}}, \quad (2 \leq \ell \leq L),$$

532

⋮

533

$$K_L = \begin{pmatrix} K_{inj} & -K_{inj} & \vdots & O \\ -K_{inj} & K_{inj} & \vdots & \tilde{K}_L \\ \vdots & \vdots & \ddots & \vdots \\ \vdots & \vdots & \vdots & \vdots \end{pmatrix} \in \mathcal{L}(L^2(D)^{2d_{in}+d_L}, L^2(D)^{d_{in}+d_{L+1}}),$$

534

$$b_L = \begin{pmatrix} O \\ O \\ \tilde{b}_L \end{pmatrix} \in L^2(D)^{d_{in}+d_{L+1}},$$

535

$$K_{L+1} = \begin{pmatrix} K_{inj} & O \\ O & \tilde{K}_{L+1} \end{pmatrix} \in \mathcal{L}(L^2(D)^{d_{in}+d_{L+1}}, L^2(D)^{d_{in}+d_{out}}),$$

536

$$b_{L+1} = \begin{pmatrix} O \\ O \end{pmatrix} \in L^2(D)^{d_{in}+d_{out}}.$$

537 Then, the operator  $H : L^2(D)^{d_{in}} \rightarrow L^2(D)^{d_{in}+d_{out}}$  has the form of

$$H := \begin{cases} \begin{pmatrix} K_{inj} \circ K_{inj} \circ \sigma \circ K_{inj} \circ \cdots \circ \sigma \circ K_{inj} \circ K_{inj} \\ \tilde{G} \end{pmatrix} & \text{in the case of (i).} \\ \begin{pmatrix} K_{inj} \circ \cdots \circ K_{inj} \\ \tilde{G} \end{pmatrix} & \text{in the case of (ii).} \end{cases}$$

<sup>2</sup>For example, if we choose the integral kernel  $k_{inj}$  as  $k_{inj}(x, y) = \sum_{k=1}^{\infty} \vec{\varphi}_k(x) \vec{\varphi}_k(y)$ , then the integral operator  $K_{inj}$  with the kernel  $k_{inj}$  is injective where  $\{\vec{\varphi}_k\}_k$  is the orthonormal basis in  $L^2(D)^{d_{in}}$ .

538 For the case of (ii), we have used the fact

$$\begin{pmatrix} I & -I \end{pmatrix} \circ \text{ReLU} \circ \begin{pmatrix} I \\ -I \end{pmatrix} = I.$$

539 Thus, in both cases,  $H$  is injective.

540 In the case of (i), as  $\sigma \in A_0^L$ , we obtain the estimate

$$\|\sigma(f)\|_{L^2(D)^{d_{in}}} \leq \sqrt{2|D|d_{in}}C_0 + \|f\|_{L^2(D)^{d_{in}}}, \quad f \in L^2(D)^{d_{in}},$$

541 where

$$C_0 := \sup_{x \in \mathbb{R}} \frac{|\sigma(x)|}{1 + |x|} < \infty.$$

542 Then we evaluate for  $a \in K(\subset B_R(0))$ ,

$$\begin{aligned} & \|H(a)\|_{L^2(D)^{d_{in}+d_{out}}} \\ & \leq \left\| \tilde{G}(a) \right\|_{L^2(D)^{d_{out}}} + \|K_{inj} \circ K_{inj} \circ \sigma \circ K_{inj} \circ \cdots \circ \sigma \circ K_{inj} \circ K_{inj}(a)\|_{L^2(D)^{d_{in}}} \\ & \leq 4M + \sqrt{2|D|d_{in}}C_0 \sum_{\ell=1}^L \|K_{inj}\|_{\text{op}}^{\ell+1} + \|K_{inj}\|_{\text{op}}^{L+2} R =: C_H. \end{aligned} \quad (\text{B.7})$$

543 In the case of (ii), we find the estimate, for  $a \in K$ ,

$$\|H(a)\|_{L^2(D)^{d_{in}+d_{out}}} \leq 4M + \|K_{inj}\|_{\text{op}}^{L+2} R < C_H. \quad (\text{B.8})$$

544 From (B.6) (especially,  $\text{Ran}(\pi_1 H) \subset C(D)$ ) and Remark 2, we can choose an orthogonal sequence  
545  $\{\xi_k\}_{k \in \mathbb{N}}$  in  $L^2(D)$  such that (3.1) holds. By applying Lemma 1, as  $T = H$ ,  $n = d_{in}$ ,  $m = d_{in} + d_{out}$ ,  
546  $\ell = d_{out}$ , we find that

$$G := \underbrace{\pi_{d_{out}} \circ Q_\alpha \circ P_{V_\alpha^\perp}}_{=: B} \circ H : L^2(D)^{d_{in}} \rightarrow L^2(D)^{d_{out}},$$

547 is injective. Here,  $P_{V_\alpha^\perp}$  and  $Q_\alpha$  are defined as in Remark 3; we choose  $0 < \alpha \ll 1$  such that

$$\left\| P_{V_\alpha^\perp} - P_{V_0^\perp} \right\|_{\text{op}} < \min \left( \frac{\epsilon}{10C_H}, 1 \right) =: \epsilon_0,$$

548 where  $P_{V_0^\perp}$  is the orthogonal projection onto

$$V_0^\perp := \{0\}^{d_{in}} \times L^2(D)^{d_{out}}.$$

549 By the same argument as in the proof of Theorem 15 in Puthawala et al. [2022a], we can show that

$$\|I - Q_\alpha\|_{\text{op}} \leq 4\epsilon_0.$$

550 Furthermore, since  $B$  is a linear operator,  $B \circ K_{L+1}$  is also a linear operator with integral kernel  
551  $(Bk_{L+1}(\cdot, y))(x)$ , where  $k_{L+1}(x, y)$  is the kernel of  $K_{L+1}$ . This implies that

$$G \in \text{NO}_L(\sigma; D, d_{in}, d_{out}).$$

552 We get, for  $a \in K$ ,

$$\|G^+(a) - G(a)\|_{L^2(D)^{d_{out}}} \leq \underbrace{\|G^+(a) - \tilde{G}(a)\|_{L^2(D)^{d_{out}}}}_{(\text{B.5}) \leq \frac{\epsilon}{2}} + \|\tilde{G}(a) - G(a)\|_{L^2(D)^{d_{out}}}. \quad (\text{B.9})$$

553 Using (B.7) and (B.8), we then obtain

$$\begin{aligned} & \left\| \tilde{G}(a) - G(a) \right\|_{L^2(D)^{d_{out}}} = \left\| \pi_{d_{out}} \circ H(a) - \pi_{d_{out}} \circ Q_\alpha \circ P_{V_\alpha^\perp} \circ H(a) \right\|_{L^2(D)^{d_{out}}} \\ & \leq \left\| \pi_{d_{out}} \circ (P_{V_0^\perp} - P_{V_\alpha^\perp} + P_{V_\alpha^\perp}) \circ H(a) - \pi_{d_{out}} \circ Q_\alpha \circ P_{V_\alpha^\perp} \circ H(a) \right\|_{L^2(D)^{d_{out}}} \\ & \leq \left\| \pi_{d_{out}} \circ (P_{V_0^\perp} - P_{V_\alpha^\perp}) \circ H(a) \right\|_{L^2(D)^{d_{out}}} + \left\| \pi_{d_{out}} \circ (I - Q_\alpha) \circ P_{V_\alpha^\perp} \circ H(a) \right\|_{L^2(D)^{d_{out}}} \\ & \leq 5\epsilon_0 \|H(a)\|_{L^2(D)^{d_{in}+d_{out}}} \leq \frac{\epsilon}{2}. \end{aligned} \quad (\text{B.10})$$

554 Combining (B.9) and (B.10), we conclude that

$$\sup_{a \in K} \|G^+(a) - G(a)\|_{L^2(D)^{d_{out}}} \leq \frac{\epsilon}{2} + \frac{\epsilon}{2} = \epsilon.$$

555

□

#### 556 B.4 Remark following Theorem 1

557 **Remark 4.** We make the following observations using Theorem 1:

558 (i) *ReLU and Leaky ReLU functions belong to  $A_0^L \cap \text{BA}$  due to the fact that  $\{\sigma \in$   
559  $C(\mathbb{R}) \mid \sigma \text{ is not a polynomial}\} \subseteq A_0$  (see Pinkus [1999]), and both the ReLU and Leaky  
560 ReLU functions belong to  $\text{BA}$  (see Lemma C.2 in Lanthaler et al. [2022]). We note that  
561 Lemma C.2 in Lanthaler et al. [2022] solely established the case for ReLU. However,  
562 it holds true for Leaky ReLU as well since the proof relies on the fact that the function  
563  $x \mapsto \min(\max(x, R), R)$  can be exactly represented by a two-layer ReLU neural network,  
564 and a two-layer Leaky ReLU neural network can also represent this function. Consequently,  
565 Leaky ReLU is one of example that satisfies (ii) in Theorem 1.*

566 (ii) *We emphasize that our infinite-dimensional result, Theorem 1, deviates from the finite-  
567 dimensional result. Puthawala et al. [2022a, Theorem 15] assumes that  $2d_{in} + 1 \leq d_{out}$   
568 due to the use of Whitney's theorem. In contrast, Theorem 1 does not assume any conditions  
569 on  $d_{in}$  and  $d_{out}$ , that is, we are able to avoid invoking Whitney's theorem by employing  
570 Lemma 1.*

571 (iii) *We provide examples that injective universality does not hold when  $L^2(D)^{d_{in}}$  and  $L^2(D)^{d_{out}}$   
572 are replaced by  $\mathbb{R}^{d_{in}}$  and  $\mathbb{R}^{d_{out}}$ : Consider the case where  $d_{in} = d_{out} = 1$  and  $G^+ : \mathbb{R} \rightarrow \mathbb{R}$   
573 is defined as  $G^+(x) = \sin(x)$ . We can not approximate  $G^+ : \mathbb{R} \rightarrow \mathbb{R}$  by an injective  
574 function  $G : \mathbb{R} \rightarrow \mathbb{R}$  in the set  $K = [0, 2\pi]$  in the  $L^\infty$ -norm. According to the topological  
575 degree theory (see Cho and Chen [2006, Theorem 1.2.6(iii)]), any continuous function  
576  $G : \mathbb{R} \rightarrow \mathbb{R}$  which satisfies  $\|G - G^+\|_{C([0, 2\pi])} < \epsilon$  satisfies the equation on both intervals  
577  $I_1 = [0, \pi]$ ,  $I_2 = [\pi, 2\pi]$   $\deg(G, I_j, s) = \deg(G^+, I_j, s) = 1$  for all  $s \in [-1 + \epsilon, 1 - \epsilon]$ ,  
578  $j = 1, 2$ . This implies that  $G : I_j \rightarrow \mathbb{R}$  obtains the value  $s \in [-1 + \epsilon, 1 - \epsilon]$  at least once.  
579 Hence,  $G$  obtains the values  $s \in [-1 + \epsilon, 1 - \epsilon]$  at least two times on the interval  $[0, 2\pi]$   
580 and is it thus not injective. It is worth noting that the degree theory exhibits significant  
581 differences between the infinite-dimensional and finite-dimensional cases [Cho and Chen,  
582 2006]).*

### 583 C Details of Section 3.3

#### 584 C.1 Finite rank approximation

585 We consider linear integral operators  $K_\ell$  with  $L^2$  kernels  $k_\ell(x, y)$ . Let  $\{\varphi_k\}_{k \in \mathbb{N}}$  be an orthonormal  
586 basis in  $L^2(D)$ . Since  $\{\varphi_k(y)\varphi_p(x)\}_{k, p \in \mathbb{N}}$  is an orthonormal basis of  $L^2(D \times D)$ , integral kernels  
587  $k_\ell \in L^2(D \times D; \mathbb{R}^{d_{\ell+1} \times d_\ell})$  in integral operators  $K_\ell \in \mathcal{L}(L^2(D)^{d_\ell}, L^2(D)^{d_{\ell+1}})$  has the expansion

$$k_\ell(x, y) = \sum_{k, p \in \mathbb{N}} C_{k, p}^{(\ell)} \varphi_k(y) \varphi_p(x),$$

588 then integral operators  $K_\ell \in \mathcal{L}(L^2(D)^{d_\ell}, L^2(D)^{d_{\ell+1}})$  take the form

$$K_\ell u(x) = \sum_{k, p \in \mathbb{N}} C_{k, p}^{(\ell)} (u, \varphi_k) \varphi_p(x), \quad u \in L^2(D)^{d_\ell},$$

589 where  $C_{k, p}^{(\ell)} \in \mathbb{R}^{d_{\ell+1} \times d_\ell}$  whose  $(i, j)$ -th component  $c_{k, p, ij}^{(\ell)}$  is given by

$$c_{k, p, ij}^{(\ell)} = (k_{\ell, ij}, \varphi_k \varphi_p)_{L^2(D \times D)}.$$

590 Here, we write  $(u, \varphi_k) \in \mathbb{R}^{d_\ell}$ ,

$$(u, \varphi_k) = ((u_1, \varphi_k)_{L^2(D)}, \dots, (u_{d_\ell}, \varphi_k)_{L^2(D)}).$$

591

592 We define  $K_{\ell,N} \in \mathcal{L}(L^2(D)^{d_\ell}, L^2(D)^{d_{\ell+1}})$  as the truncated expansion of  $K_\ell$  by  $N$  finite sum, that  
 593 is,

$$K_{\ell,N}u(x) := \sum_{k,p \leq N} C_{k,p}^{(\ell)}(u, \varphi_k) \varphi_p(x).$$

594 Then  $K_{\ell,N} \in \mathcal{L}(L^2(D)^{d_\ell}, L^2(D)^{d_{\ell+1}})$  is a finite rank operator with rank  $N$ . Furthermore, we have

$$\|K_\ell - K_{\ell,N}\|_{\text{op}} \leq \|K_\ell - K_{\ell,N}\|_{\text{HS}} = \left( \sum_{k,p \geq N} \sum_{i,j} |c_{k,p,i,j}^{(\ell)}|^2 \right)^{1/2}, \quad (\text{C.1})$$

595 which implies that as  $N \rightarrow \infty$ ,

$$\|K_\ell - K_{\ell,N}\|_{\text{op}} \rightarrow 0.$$

## 596 C.2 Layerwise injectivity

597 We first revisit layerwise injectivity and bijectivity in the case of the finite rank approximation. Let  
 598  $K_N : L^2(D)^n \rightarrow L^2(D)^m$  be a finite rank operator defined by

$$K_N u(x) := \sum_{k,p \leq N} C_{k,p}(u, \varphi_k) \varphi_p(x), \quad u \in L^2(D)^n,$$

599 where  $C_{k,p} \in \mathbb{R}^{m \times n}$  and  $(u, \varphi_p) \in \mathbb{R}^n$  is given by

$$(u, \varphi_p) = ((u_1, \varphi_p)_{L^2(D)}, \dots, (u_n, \varphi_p)_{L^2(D)}).$$

600 Let  $b_N \in L^2(D)^n$  be defined by

$$b_N(x) := \sum_{p \leq N} b_p \varphi_p(x),$$

601 in which  $b_p \in \mathbb{R}^m$ . As analogues of Propositions 1 and 2, we obtain the following characterization.

602 **Proposition 5.** (i) *The operator*

$$\text{ReLU} \circ (K_N + b_N) : (\text{span}\{\varphi_k\}_{k \leq N})^n \rightarrow L^2(D)^m,$$

603 *is injective if and only if for every  $v \in (\text{span}\{\varphi_k\}_{k \leq N})^n$ ,*

$$\{u \in L^2(D)^n \mid \vec{u}_N \in \text{Ker}(C_{S,N})\} \cap X(v, K_N + b_N) \cap (\text{span}\{\varphi_k\}_{k \leq N})^n = \{0\}.$$

604 *where  $S(v, K_N + b_N) \subset [m]$  and  $X(v, K_N + b_N)$  are defined in Definition 2, and*

$$\vec{u}_N := ((u, \varphi_p))_{p \leq N} \in \mathbb{R}^{Nn}, \quad C_{S,N} := \left( C_{k,q} \Big|_{S(v, K_N + b_N)} \right)_{k,q \in [N]} \in \mathbb{R}^{N|S(v, K_N + b_N)| \times Nn}. \quad (\text{C.2})$$

605 (ii) *Let  $\sigma$  be injective. Then the operator*

$$\sigma \circ (K_N + b_N) : (\text{span}\{\varphi_k\}_{k \leq N})^n \rightarrow L^2(D)^m,$$

606 *is injective if and only if  $C_N$  is injective, where*

$$C_N := (C_{k,q})_{k,q \in [N]} \in \mathbb{R}^{Nm \times Nn}. \quad (\text{C.3})$$

607 *Proof.* The above statements follow from Propositions 1 and 2 by observing that  $u \in \text{Ker}(K_N)$  is  
 608 equivalent to (cf. (C.2) and (C.3))

$$\sum_{k,p \leq N} C_{k,p}(u, \varphi_k) \varphi_p = 0, \iff C_N \vec{u}_N = 0.$$

609 □



610 **C.3 Global injectivity**

611 We revisit global injectivity in the case of finite rank approximation. As an analogue of Lemma 1, we  
612 have the following

613 **Lemma 2.** *Let  $N, N' \in \mathbb{N}$  and  $n, m, \ell \in \mathbb{N}$  with  $N'm > N'\ell \geq 2Nn + 1$ , and let  $T : L^2(D)^n \rightarrow$   
614  $L^2(D)^m$  be a finite rank operator with  $N'$  rank, that is,*

$$\text{Ran}(T) \subset (\text{span}\{\varphi_k\}_{k \leq N'})^m, \quad (\text{C.4})$$

615 *and Lipschitz continuous, and*

$$T : (\text{span}\{\varphi_k\}_{k \leq N})^n \rightarrow L^2(D)^m,$$

616 *is injective. Then, there exists a finite rank operator  $B \in \mathcal{L}(L^2(D)^m, L^2(D)^\ell)$  with rank  $N'$  such  
617 that*

$$B \circ T : (\text{span}\{\varphi_k\}_{k \leq N})^n \rightarrow (\text{span}\{\varphi_k\}_{k \leq N'})^\ell,$$

618 *is injective.*

619 *Proof.* From (C.4),  $T : L^2(D)^n \rightarrow L^2(D)^m$  has the form of

$$T(a) = \sum_{k \leq N'} (T(a), \varphi_k) \varphi_k,$$

620 where  $(T(a), \varphi_k) \in \mathbb{R}^m$ . We define  $\mathbf{T} : \mathbb{R}^{Nn} \rightarrow \mathbb{R}^{N'm}$  by

$$\mathbf{T}(\mathbf{a}) := ((T(\mathbf{a}), \varphi_k))_{k \in [N']} \in \mathbb{R}^{N'm}, \quad \mathbf{a} \in \mathbb{R}^{Nn},$$

621 where  $T(\mathbf{a}) \in L^2(D)^m$  is defined by

$$T(\mathbf{a}) := T \left( \sum_{k \leq N} a_k \varphi_k \right) \in L^2(D)^m,$$

622 in which  $a_k \in \mathbb{R}^n$ ,  $\mathbf{a} = (a_1, \dots, a_N) \in \mathbb{R}^{Nn}$ .

623 Since  $T : L^2(D)^n \rightarrow L^2(D)^m$  is Lipschitz continuous,  $\mathbf{T} : \mathbb{R}^{Nn} \rightarrow \mathbb{R}^{N'm}$  is also Lipschitz  
624 continuous. As  $N'm > N'\ell \geq 2Nn + 1$ , we can apply Lemma 29 from Puthawala et al. [2022a]  
625 with  $D = N'm$ ,  $m = N'\ell$ ,  $n = Nn$ . According to this lemma, there exists a  $N'\ell$ -dimensional linear  
626 subspace  $\mathbf{V}^\perp$  in  $\mathbb{R}^{N'm}$  such that

$$\|P_{\mathbf{V}^\perp} - P_{\mathbf{V}_0^\perp}\|_{\text{op}} < 1,$$

627 and

$$P_{\mathbf{V}^\perp} \circ \mathbf{T} : \mathbb{R}^{Nn} \rightarrow \mathbb{R}^{N'm},$$

628 is injective, where  $\mathbf{V}_0^\perp = \{0\}^{N'(m-\ell)} \times \mathbb{R}^{N'\ell}$ . Furthermore, in the proof of Theorem 15 of Puthawala  
629 et al. [2022a], denoting

$$\mathbf{B} := \pi_{N'\ell} \circ \mathbf{Q} \circ P_{\mathbf{V}^\perp} \in \mathbb{R}^{N'\ell \times N'm},$$

630 we are able to show that

$$\mathbf{B} \circ \mathbf{T} : \mathbb{R}^{Nn} \rightarrow \mathbb{R}^{N'\ell}$$

631 is injective. Here,  $\pi_{N'\ell} : \mathbb{R}^{N'm} \rightarrow \mathbb{R}^{N'\ell}$

$$\pi_{N'\ell}(a, b) := b, \quad (a, b) \in \mathbb{R}^{N'(m-\ell)} \times \mathbb{R}^{N'\ell},$$

632 where  $\mathbf{Q} : \mathbb{R}^{N'm} \rightarrow \mathbb{R}^{N'm}$  is defined by

$$\mathbf{Q} := \left( P_{\mathbf{V}_0^\perp} P_{\mathbf{V}^\perp} + (I - P_{\mathbf{V}_0^\perp})(I - P_{\mathbf{V}^\perp}) \right) \left( I - (P_{\mathbf{V}_0^\perp} - P_{\mathbf{V}^\perp})^2 \right)^{-1/2}.$$

633 We define  $B : L^2(D)^m \rightarrow L^2(D)^\ell$  by

$$Bu = \sum_{k, p \leq N'} \mathbf{B}_{k,p}(u, \varphi_k) \varphi_p,$$

634 where  $\mathbf{B}_{k,p} \in \mathbb{R}^{\ell \times m}$ ,  $\mathbf{B} = (\mathbf{B}_{k,p})_{k,p \in [N']}$ . Then  $B : L^2(D)^m \rightarrow L^2(D)^\ell$  is a linear finite rank  
 635 operator with  $N'$  rank, and

$$B \circ T : L^2(D)^n \rightarrow L^2(D)^\ell$$

636 is injective because, by the construction, it is equivalent to

$$\mathbf{B} \circ \mathbf{T} : \mathbb{R}^{Nn} \rightarrow \mathbb{R}^{N'\ell},$$

637 is injective. □

#### 638 C.4 Proof of Theorem 2

639 **Definition 4.** We define the set of integral neural operators with  $N$  rank by

$$\begin{aligned} \text{NO}_{L,N}(\sigma; D, d_{in}, d_{out}) := & \left\{ G_N : L^2(D)^{d_{in}} \rightarrow L^2(D)^{d_{out}} \mid \right. \\ G_N = & K_{L+1,N} \circ (K_{L,N} + b_{L,N}) \circ \sigma \cdots \circ (K_{2,N} + b_{2,N}) \circ \sigma \circ (K_{1,N} + b_{1,N}) \circ (K_{0,N} + b_{0,N}), \\ K_{\ell,N} \in & \mathcal{L}(L^2(D)^{d_\ell}, L^2(D)^{d_{\ell+1}}), K_{\ell,N} : f \mapsto \sum_{k,p \leq N} C_{k,p}^{(\ell)}(f, \varphi_k) \varphi_p, \\ b_{\ell,N} \in & L^2(D; \mathbb{R}^{d_{\ell+1}}), b_{\ell,N} = \sum_{p \leq N} b_p^{(\ell)} \varphi_p \\ C_{k,p}^{(\ell)} \in & \mathbb{R}^{d_{\ell+1} \times d_\ell}, b_p^{(\ell)} \in \mathbb{R}^{d_{\ell+1}}, k, p \leq N, \\ & d_\ell \in \mathbb{N}, d_0 = d_{in}, d_{L+2} = d_{out}, \ell = 0, \dots, L+2 \left. \right\}. \end{aligned} \tag{C.5}$$

640 *Proof.* Let  $R > 0$  such that

$$K \subsetneq B_R(0),$$

641 where  $B_R(0) := \{u \in L^2(D)^{d_{in}} \mid \|u\|_{L^2(D)^{d_{in}}} \leq R\}$ . As ReLU and Leaky ReLU function  
 642 belongs to  $A_0^L \cap \text{BA}$ , by Theorem 11 of Kovachki et al. [2021b], there exists  $L \in \mathbb{N}$  and  $\tilde{G} \in$   
 643  $\text{NO}_L(\sigma; D, d_{in}, d_{out})$  such that

$$\sup_{a \in K} \left\| G^+(a) - \tilde{G}(a) \right\|_{L^2(D)^{d_{out}}} \leq \frac{\epsilon}{3}. \tag{C.6}$$

644 and

$$\left\| \tilde{G}(a) \right\|_{L^2(D)^{d_{out}}} \leq 4M, \quad \text{for } a \in L^2(D)^{d_{in}}, \quad \|a\|_{L^2(D)^{d_{in}}} \leq R.$$

645 We write operator  $\tilde{G}$  by

$$\tilde{G} = \tilde{K}_{L+1} \circ (\tilde{K}_L + \tilde{b}_L) \circ \sigma \cdots \circ (\tilde{K}_2 + \tilde{b}_2) \circ \sigma \circ (\tilde{K}_1 + \tilde{b}_1) \circ (\tilde{K}_0 + \tilde{b}_0),$$

646 where

$$\begin{aligned} \tilde{K}_\ell \in & \mathcal{L}(L^2(D)^{d_\ell}, L^2(D)^{d_{\ell+1}}), \tilde{K}_\ell : f \mapsto \int_D \tilde{k}_\ell(\cdot, y) f(y) dy, \\ \tilde{k}_\ell \in & L^2(D \times D; \mathbb{R}^{d_{\ell+1} \times d_\ell}), \tilde{b}_\ell \in L^2(D; \mathbb{R}^{d_{\ell+1}}), \\ & d_\ell \in \mathbb{N}, d_0 = d_{in}, d_{L+2} = d_{out}, \ell = 0, \dots, L+2. \end{aligned}$$

647 We set  $\tilde{G}_{N'} \in \text{NO}_{L,N'}(\sigma; D, d_{in}, d_{out})$  such that

$$\tilde{G}_{N'} = \tilde{K}_{L+1,N'} \circ (\tilde{K}_{L,N'} + \tilde{b}_{L,N'}) \circ \sigma \cdots \circ (\tilde{K}_{2,N'} + \tilde{b}_{2,N'}) \circ \sigma \circ (\tilde{K}_{1,N'} + \tilde{b}_{1,N'}) \circ (\tilde{K}_{0,N'} + \tilde{b}_{0,N'}),$$

648 where  $\tilde{K}_{\ell,N'} : L^2(D)^{d_\ell} \rightarrow L^2(D)^{d_{\ell+1}}$  is defined by

$$\tilde{K}_{\ell,N'} u(x) = \sum_{k,p \leq N'} C_{k,p}^{(\ell)}(u, \varphi_k) \varphi_p(x),$$

649 where  $C_{k,p}^{(\ell)} \in \mathbb{R}^{d_{\ell+1} \times d_{\ell}}$  whose  $(i, j)$ -th component  $c_{k,p,ij}^{(\ell)}$  is given by

$$c_{k,p,ij}^{(\ell)} = (\tilde{K}_{\ell,ij}, \varphi_k \varphi_p)_{L^2(D \times D)}.$$

650 Since

$$\left\| \tilde{K}_{\ell} - \tilde{K}_{\ell, N'} \right\|_{\text{op}}^2 \leq \left\| \tilde{K}_{\ell} - \tilde{K}_{\ell, N'} \right\|_{\text{HS}}^2 = \sum_{k,p \geq N'+1} \sum_{i,j} |c_{k,p,ij}^{(\ell)}|^2 \rightarrow 0 \text{ as } N' \rightarrow \infty,$$

651 there is a large  $N' \in \mathbb{N}$  such that

$$\sup_{a \in K} \left\| \tilde{G}(a) - \tilde{G}_{N'}(a) \right\|_{L^2(D)^{d_{\text{out}}}} \leq \frac{\epsilon}{3}. \quad (\text{C.7})$$

652 Then, we have

$$\begin{aligned} \sup_{a \in K} \left\| \tilde{G}_{N'}(a) \right\|_{L^2(D)^{d_{\text{out}}}} &\leq \sup_{a \in K} \left\| \tilde{G}_{N'}(a) - \tilde{G}(a) \right\|_{L^2(D)^{d_{\text{out}}}} + \sup_{a \in K} \left\| \tilde{G}(a) \right\|_{L^2(D)^{d_{\text{out}}}} \\ &\leq 1 + 4M. \end{aligned}$$

653 We define the operator  $H_{N'} : L^2(D)^{d_{\text{in}}} \rightarrow L^2(D)^{d_{\text{in}} + d_{\text{out}}}$  by

$$H_{N'}(a) = \begin{pmatrix} H_{N'}(a)_1 \\ H_{N'}(a)_2 \end{pmatrix} := \begin{pmatrix} K_{\text{inj}, N} \circ \cdots \circ K_{\text{inj}, N}(a) \\ \tilde{G}_{N'}(a) \end{pmatrix},$$

654 where  $K_{\text{inj}, N} : L^2(D)^{d_{\text{in}}} \rightarrow L^2(D)^{d_{\text{in}}}$  is defined by

$$K_{\text{inj}, N} u = \sum_{k \leq N} (u, \varphi_k) \varphi_k.$$

655 As  $K_{\text{inj}, N} (\text{span}\{\varphi_k\}_{k \leq N})^{d_{\text{in}}} \rightarrow L^2(D)^{d_{\text{in}}}$  is injective,

$$H_{N'} : (\text{span}\{\varphi_k\}_{k \leq N})^{d_{\text{in}}} \rightarrow (\text{span}\{\varphi_k\}_{k \leq N})^{d_{\text{in}}} \times (\text{span}\{\varphi_k\}_{k \leq N'})^{d_{\text{out}}},$$

656 is injective. Furthermore, by the same argument (ii) (construction of  $H$ ) in the proof of Theorem 1,

$$H_{N'} \in \text{NO}_{L, N'}(\sigma; D, d_{\text{in}}, d_{\text{out}}),$$

657 because both of two-layer ReLU and Leaky ReLU neural networks can represent the identity map.  
658 Note that above  $K_{\text{inj}, N}$  is an orthogonal projection, so that  $K_{\text{inj}, N} \circ \cdots \circ K_{\text{inj}, N} = K_{\text{inj}, N}$ . However,  
659 we write above  $H_{N'}(a)_1$  as  $K_{\text{inj}, N} \circ \cdots \circ K_{\text{inj}, N}(a)$  so that it can be considered as combination of  
660  $(L + 2)$  layers of neural networks.

661 We estimate that for  $a \in L^2(D)^{d_{\text{in}}}$ ,  $\|a\|_{L^2(D)^{d_{\text{in}}}} \leq R$ ,

$$\|H_{N'}(a)\|_{L^2(D)^{d_{\text{in}} + d_{\text{out}}}} \leq 1 + 4M + \|K_{\text{inj}}\|_{\text{op}}^{L+2} R =: C_H.$$

662 Here, we repeat an argument similar to the one in the proof of Lemma 2:  $H_{N'} : L^2(D)^{d_{\text{in}}} \rightarrow$   
663  $L^2(D)^{d_{\text{in}} + d_{\text{out}}}$  has the form of

$$H_{N'}(a) = \begin{pmatrix} \sum_{k \leq N} (H_{N'}(a)_1, \varphi_k) \varphi_k, \sum_{k \leq N'} (H_{N'}(a)_2, \varphi_k) \varphi_k \end{pmatrix}.$$

664 where  $(H_{N'}(a)_1, \varphi_k) \in \mathbb{R}^{d_{\text{in}}}$ ,  $(H_{N'}(a)_2, \varphi_k) \in \mathbb{R}^{d_{\text{out}}}$ . We define  $\mathbf{H}_{N'} : \mathbb{R}^{Nd_{\text{in}}} \rightarrow \mathbb{R}^{Nd_{\text{in}} + N'd_{\text{out}}}$   
665 by

$$\mathbf{H}_{N'}(\mathbf{a}) := \left[ \left( (H_{N'}(\mathbf{a})_1, \varphi_k) \right)_{k \in [N]}, \left( (H_{N'}(\mathbf{a})_2, \varphi_k) \right)_{k \in [N']} \right] \in \mathbb{R}^{Nd_{\text{in}} + N'd_{\text{out}}}, \mathbf{a} \in \mathbb{R}^{Nd_{\text{in}}},$$

666 where  $H_{N'}(\mathbf{a}) = (H_{N'}(\mathbf{a})_1, H_{N'}(\mathbf{a})_2) \in L^2(D)^{d_{\text{in}} + d_{\text{out}}}$  is defined by

$$H_{N'}(\mathbf{a})_1 := H_{N'} \left( \sum_{k \leq N} a_k \varphi_k \right)_1 \in L^2(D)^{d_{\text{in}}},$$

667

$$H_{N'}(\mathbf{a})_2 := H_{N'} \left( \sum_{k \leq N'} a_k \varphi_k \right)_2 \in L^2(D)^{d_{out}},$$

668 where  $a_k \in \mathbb{R}^{d_{in}}$ ,  $\mathbf{a} = (a_1, \dots, a_N) \in \mathbb{R}^{Nd_{in}}$ . Since  $H_{N'} : L^2(D)^{d_{in}} \rightarrow L^2(D)^{d_{in}+d_{out}}$  is Lipschitz  
669 continuous,  $\mathbf{H}_{N'} : \mathbb{R}^{Nd_{in}} \rightarrow \mathbb{R}^{N'd_{out}}$  is also Lipschitz continuous. As

$$Nd_{in} + N'd_{out} > N'd_{out} \geq 2Nd_{in} + 1,$$

670 we can apply Lemma 29 of Puthawala et al. [2022a] with  $D = Nd_{in} + N'd_{out}$ ,  $m = N'd_{out}$ ,  
671  $n = Nd_{in}$ . According to this lemma, there exists a  $N'd_{out}$ -dimensional linear subspace  $\mathbf{V}^\perp$  in  
672  $\mathbb{R}^{Nd_{in}+N'd_{out}}$  such that

$$\left\| P_{\mathbf{V}^\perp} - P_{\mathbf{V}_0^\perp} \right\|_{op} < \min \left( \frac{\epsilon}{15C_{H_N}}, 1 \right) =: \epsilon_0$$

673 and

$$P_{\mathbf{V}^\perp} \circ \mathbf{H}_{N'} : \mathbb{R}^{Nd_{in}} \rightarrow \mathbb{R}^{Nd_{in}+N'd_{out}},$$

674 is injective, where  $\mathbf{V}_0^\perp = \{0\}^{Nd_{in}} \times \mathbb{R}^{N'd_{out}}$ . Furthermore, in the proof of Theorem 15 of Puthawala  
675 et al. [2022a], denoting by

$$\mathbf{B} := \pi_{N'd_{out}} \circ \mathbf{Q} \circ P_{\mathbf{V}^\perp},$$

676 we can show that

$$\mathbf{B} \circ \mathbf{H}_{N'} : \mathbb{R}^{Nd_{in}} \rightarrow \mathbb{R}^{N'd_{out}},$$

677 is injective, where  $\pi_{N'd_{out}} : \mathbb{R}^{Nd_{in}+N'd_{out}} \rightarrow \mathbb{R}^{N'd_{out}}$

$$\pi_{N'd_{out}}(a, b) := b, \quad (a, b) \in \mathbb{R}^{Nd_{in}} \times \mathbb{R}^{N'd_{out}},$$

678 and  $\mathbf{Q} : \mathbb{R}^{Nd_{in}+N'd_{out}} \rightarrow \mathbb{R}^{Nd_{in}+N'd_{out}}$  is defined by

$$\mathbf{Q} := \left( P_{\mathbf{V}_0^\perp} P_{\mathbf{V}^\perp} + (I - P_{\mathbf{V}_0^\perp})(I - P_{\mathbf{V}^\perp}) \right) \left( I - (P_{\mathbf{V}_0^\perp} - P_{\mathbf{V}^\perp}) \right)^{-1/2}.$$

679 By the same argument in proof of Theorem 15 in Puthawala et al. [2022a], we can show that

$$\|I - \mathbf{Q}\|_{op} \leq 4\epsilon_0.$$

680 We define  $B : L^2(D)^{d_{in}+d_{out}} \rightarrow L^2(D)^{d_{out}}$

$$Bu = \sum_{k,p \leq N'} \mathbf{B}_{k,p}(u, \varphi_k) \varphi_p,$$

681  $\mathbf{B}_{k,p} \in \mathbb{R}^{d_{out} \times (d_{in}+d_{out})}$ ,  $\mathbf{B} = (\mathbf{B}_{k,p})_{k,p \in [N']}$ , then  $B : L^2(D)^{d_{in}+d_{out}} \rightarrow L^2(D)^{d_{out}}$  is a linear  
682 finite rank operator with  $N'$  rank. Then,

$$G_{N'} := B \circ H_{N'} : L^2(D)^{d_{in}} \rightarrow L^2(D)^{d_{out}},$$

683 is injective because by the construction, it is equivalent to

$$\mathbf{B} \circ \mathbf{H}_{N'} : \mathbb{R}^{Nd_{in}} \rightarrow \mathbb{R}^{N'd_{out}},$$

684 is injective. Furthermore, we have

$$G_{N'} \in NO_{L,N'}(\sigma; D, d_{in}, d_{out}).$$

685 Indeed,  $H_{N'} \in NO_{L,N'}(\sigma; D, d_{in}, d_{out})$ ,  $B$  is the linear finite rank operator with  $N'$  rank, and  
686 multiplication of two linear finite rank operators with  $N'$  rank is also a linear finite rank operator with  
687  $N'$  rank.

688 Finally, we estimate for  $a \in K$ ,

$$\begin{aligned} & \|G^+(a) - G_{N'}(a)\|_{L^2(D)^{d_{out}}} \\ &= \underbrace{\|G^+(a) - \tilde{G}(a)\|_{L^2(D)^{d_{out}}}}_{(C.6) \leq \frac{\epsilon}{3}} + \underbrace{\|\tilde{G}(a) - \tilde{G}_{N'}(a)\|_{L^2(D)^{d_{out}}}}_{(C.7) \leq \frac{\epsilon}{3}} + \|\tilde{G}_{N'}(a) - G_{N'}(a)\|_{L^2(D)^{d_{out}}}. \end{aligned} \tag{C.8}$$

689 Using notation  $(a, \varphi_k) \in \mathbb{R}^{d_{in}}$ , and  $\mathbf{a} = ((a, \varphi_k))_{k \in [N]} \in \mathbb{R}^{Nd_{in}}$ , we further estimate for  $a \in K$ ,

$$\begin{aligned}
& \left\| \tilde{G}_{N'}(a) - G_{N'}(a) \right\|_{L^2(Q)^{d_{out}}} = \left\| \pi_{d_{out}} H_{N'}(a) - B \circ H_{N'}(a) \right\|_{L^2(Q)^{d_{out}}} \\
& = \left\| \pi_{N'd_{out}} \mathbf{H}_{N'}(\mathbf{a}) - \mathbf{B} \circ \mathbf{H}_{N'}(\mathbf{a}) \right\|_2 \\
& = \left\| \pi_{N'd_{out}} \circ \mathbf{H}_{N'}(\mathbf{a}) - \pi_{N'd_{out}} \circ \mathbf{Q} \circ P_{\mathbf{V}^\perp} \circ \mathbf{H}_{N'}(\mathbf{a}) \right\|_2 \\
& \leq \left\| \pi_{N'd_{out}} \circ (P_{\mathbf{V}_0^\perp} - P_{\mathbf{V}^\perp} + P_{\mathbf{V}^\perp}) \circ \mathbf{H}_{N'}(\mathbf{a}) - \pi_{N'd_{out}} \circ \mathbf{Q} \circ P_{\mathbf{V}^\perp} \circ \mathbf{H}_{N'}(\mathbf{a}) \right\|_2 \quad (\text{C.9}) \\
& \leq \left\| \pi_{N'd_{out}} \circ (P_{\mathbf{V}_0^\perp} - P_{\mathbf{V}^\perp}) \circ \mathbf{H}_{N'}(\mathbf{a}) \right\|_2 + \left\| \pi_{N'd_{out}} \circ (I - \mathbf{Q}) \circ P_{\mathbf{V}^\perp} \circ \mathbf{H}_{N'}(\mathbf{a}) \right\|_2 \\
& \leq 5\epsilon_0 \underbrace{\left\| \mathbf{H}_{N'}(\mathbf{a}) \right\|_2}_{= \|H_{N'}(a)\|_{L^2(D)^{d_{out}}} < C_H} \leq \frac{\epsilon}{3},
\end{aligned}$$

690 where  $\|\cdot\|_2$  is the Euclidean norm. Combining (C.8) and (C.9), we conclude that

$$\sup_{a \in K} \left\| G^+(a) - G_{N'}(a) \right\|_{L^2(D)^{d_{out}}} \leq \frac{\epsilon}{3} + \frac{\epsilon}{3} + \frac{\epsilon}{3} = \epsilon.$$

691

□

## 692 D Details of Section 4.1

### 693 D.1 Proof of Proposition 3

694 *Proof.* Since  $W$  is bijective, and  $\sigma$  is surjective, it is enough to show that  $u \mapsto Wu + K(u)$  is  
695 surjective. We observe that for  $z \in L^2(D)^n$ ,

$$Wu + K(u) = z,$$

696 is equivalent to

$$H_z(u) := -W^{-1}K(u) + W^{-1}z = u.$$

697 We will show that  $H_z : L^2(D)^n \rightarrow L^2(D)^n$  has a fixed point for each  $z \in L^2(D)^n$ . By the  
698 Leray-Schauder theorem, see Gilbarg and Trudinger [2001, Theorem 11.3],  $H : L^2(D) \rightarrow L^2(D)$   
699 has a fixed point if the union  $\bigcup_{0 < \lambda \leq 1} V_\lambda$  is bounded, where the sets

$$\begin{aligned}
V_\lambda & := \{u \in L^2(D) : u = \lambda H_z(u)\} \\
& = \{u \in L^2(D) : \lambda^{-1}u = H_z(u)\} \\
& = \{u \in L^2(D) : -\lambda^{-1}u = W^{-1}K(u) - W^{-1}z\},
\end{aligned}$$

700 are parametrized by  $0 < \lambda \leq 1$ .

701 As the map  $u \mapsto \alpha u + W^{-1}K(u)$  is coercive, there is an  $r > 0$  such that for  $\|u\|_{L^2(D)^n} > r$ ,

$$\frac{\langle \alpha u + W^{-1}K(u), u \rangle_{L^2(D)^n}}{\|u\|_{L^2(D)^n}} \geq \|W^{-1}z\|_{L^2(D)^n}.$$

702 Thus, we have that for  $\|u\|_{L^2(D)^n} > r$

$$\begin{aligned}
& \frac{\langle W^{-1}K(u) - W^{-1}z, u \rangle_{L^2(D)^n}}{\|u\|_{L^2(D)^n}^2} \\
& \geq \frac{\langle \alpha u + W^{-1}K(u), u \rangle_{L^2(D)^n} - \langle \alpha u + W^{-1}z, u \rangle_{L^2(D)^n}}{\|u\|_{L^2(D)^n}^2} \\
& \geq \frac{\|W^{-1}z\|_{L^2(D)^n}}{\|u\|_{L^2(D)^n}} - \frac{\langle W^{-1}z, u \rangle_{L^2(D)^n}}{\|u\|_{L^2(D)^n}^2} - \alpha \geq -\alpha > -1,
\end{aligned}$$

703 and, hence, for all  $\|u\|_{L^2(D)} > r_0$  and  $\lambda \in (0, 1]$  we have  $u \notin V_\lambda$ . Thus

$$\bigcup_{\lambda \in (0,1]} V_\lambda \subset B(0, r_0).$$

704 Again, by the Leray-Schauder theorem (see Gilbarg and Trudinger [2001, Theorem 11.3]),  $H_z$  has a  
705 fixed point.  $\square$

## 706 D.2 Examples for Proposition 3

707 **Example 2.** We consider the case where  $n = 1$  and  $D \subset \mathbb{R}^d$  is a bounded interval. We consider the  
708 non-linear integral operator,

$$K(u)(x) := \int_D k(x, y, u(x))u(y)dy, \quad x \in D,$$

709 and  $k(x, y, t)$  is bounded, that is, there is  $C_K > 0$  such that

$$|k(x, y, t)| \leq C_K, \quad x, y \in D, \quad t \in \mathbb{R}.$$

710 If  $\|W^{-1}\|_{\text{op}}$  is small enough such that

$$1 > \|W^{-1}\|_{\text{op}} C_K |D|,$$

711 then, for  $\alpha \in (\|W^{-1}\|_{\text{op}} C_K |D|, 1)$ ,  $u \mapsto \alpha u + W^{-1}K(u)$  is coercive. Indeed, we have for  
712  $u \in L^2(D)$ ,

$$\begin{aligned} & \frac{\langle \alpha u + W^{-1}K(u), u \rangle_{L^2(D)}}{\|u\|_{L^2(D)}} \\ & \geq \alpha \|u\|_{L^2(D)} - \|W^{-1}\|_{\text{op}} \|K(u)\|_{L^2(D)} \geq \underbrace{(\alpha - \|W^{-1}\|_{\text{op}} C_K |D|)}_{>0} \|u\|_{L^2(D)}. \end{aligned}$$

713 For example, we can consider a kernel

$$k(x, y, t) = \sum_{j=1}^J c_j(x, y) \sigma_s(a_j(x, y)t + b_j(x, y)),$$

714 where  $\sigma_s : \mathbb{R} \rightarrow \mathbb{R}$  is the sigmoid function defined by

$$\sigma_s(t) = \frac{1}{1 + e^{-t}}.$$

715 There are functions  $a, b, c \in C(\overline{D} \times \overline{D})$  such that

$$\sum_{j=1}^J \|c_j\|_{L^\infty(D \times D)} < \|W^{-1}\|_{\text{op}}^{-1} |D|^{-1}.$$

716 **Example 3.** Again, we consider the case where  $n = 1$  and  $D \subset \mathbb{R}^d$  is a bounded set. We assume that  
717  $W \in C^1(\overline{D})$  satisfies  $0 < c_1 \leq W(x) \leq c_2$ . For simplicity, we assume that  $|D| = 1$ . We consider  
718 the non-linear integral operator

$$K(u)(x) := \int_D k(x, y, u(x))u(y)dy, \quad x \in D, \quad (\text{D.1})$$

719 where

$$k(x, y, t) = \sum_{j=1}^J c_j(x, y) \sigma_{\text{wire}}(a_j(x, y)t + b_j(x, y)), \quad (\text{D.2})$$

720 in which  $\sigma_{wire} : \mathbb{R} \rightarrow \mathbb{R}$  is the wavelet function defined by

$$\sigma_{wire}(t) = \text{Im}(e^{i\omega t} e^{-t^2}),$$

721 and  $a_j, b_j, c_j \in C(\overline{D} \times \overline{D})$  are such that the  $a_j(x, y)$  are nowhere vanishing functions, that is,  
 722  $a_j(x, y) \neq 0$  for all  $x, y \in \overline{D} \times \overline{D}$ .

723 The next lemma holds for any activation function with exponential decay, including the activation  
 724 function  $\sigma_{wire}$  and settles the key condition for Proposition 3 to hold.

725 **Lemma 3.** Assume that  $|D| = 1$  and the activation function  $\sigma : \mathbb{R} \rightarrow \mathbb{R}$  is continuous. Assume that  
 726 there exists  $M_1, m_0 > 0$  such that

$$|\sigma(t)| \leq M_1 e^{-m_0|t|}, \quad t \in \mathbb{R}.$$

727 Let  $a_j, b_j, c_j \in C(\overline{D} \times \overline{D})$  be such that  $a_j(x, y)$  are nowhere vanishing functions. Moreover, let  
 728  $K : L^2(D) \rightarrow L^2(D)$  be a non-linear integral operator given in (D.1) with a kernel satisfying (D.2),  
 729  $\alpha > 0$  and  $0 < c_0 \leq W(x) \leq c_1$ . Then function  $F : L^2(D) \rightarrow L^2(D)$ ,  $F(u) = \alpha u + W^{-1}K(u)$   
 730 is coercive.

731 *Proof.* As  $\overline{D}$  is compact, there is  $a_0 > 0$  such that for all  $j = 1, 2, \dots, J$  we have  $|a_j(x, y)| \geq a_0$   
 732 a.e. and  $|b_j(x, y)| \leq b_0$  a.e. We point out that  $|\sigma(t)| \leq M_1$ . Next, let  $\varepsilon > 0$  be such that

$$\left( \sum_{j=1}^J \|W^{-1}c_j\|_{L^\infty(D \times D)} \right) M_1 \varepsilon < \frac{\alpha}{4}, \quad (\text{D.3})$$

733  $\lambda > 0$ , and  $u \in L^2(D)$ . We define the sets

$$\begin{aligned} D_1(\lambda) &= \{x \in D : |u(x)| \geq \varepsilon \lambda\}, \\ D_2(\lambda) &= \{x \in D : |u(x)| < \varepsilon \lambda\}. \end{aligned}$$

734 Then, for  $x \in D_2(\lambda)$ ,

$$\begin{aligned} & \sum_{j=1}^J \|W^{-1}c_j\|_{L^\infty(D \times D)} |\sigma(a_j(x, y)u(x) + b_j(x, y))u(x)| \\ & \leq \sum_{j=1}^J \|W^{-1}c_j\|_{L^\infty(D \times D)} M_1 \varepsilon \lambda \stackrel{(\text{D.3})}{\leq} \frac{\alpha}{4} \lambda. \end{aligned}$$

735 After  $\varepsilon$  is chosen as in the above, we choose  $\lambda_0 \geq \max(1, b_0/(a_0\varepsilon))$  to be sufficiently large so that  
 736 for all  $|t| \geq \varepsilon \lambda_0$  it holds that

$$\left( \sum_{j=1}^J \|W^{-1}c_j\|_{L^\infty(D \times D)} \right) M_1 \exp(-m_0|a_0 t - b_0|) t < \frac{\alpha}{4}.$$

737 Here, we observe that, as  $\lambda_0 \geq b_0/(a_0\varepsilon)$ , we have that for all  $|t| \geq \varepsilon \lambda_0$ ,  $a_0|t| - b_0 > 0$ . Then, when  
 738  $\lambda \geq \lambda_0$ , we have for  $x \in D_1(\lambda)$ ,

$$\left( \sum_{j=1}^J \|W^{-1}c_j\|_{L^\infty(D \times D)} \right) \left| \sigma(a_j(x, y)u(x) + b_j(x, y))u(x) \right| \leq \frac{\alpha}{4}.$$

739 When  $u \in L^2(D)$  has the norm  $\|u\|_{L^2(D)} = \lambda \geq \lambda_0 \geq 1$ , we have

$$\begin{aligned}
& \left| \int_D \int_D W(x)^{-1} k(x, y, u(x)) u(x) u(y) dx dy \right| \\
& \leq \int_D \left( \int_{D_1} \sum_{j=1}^J \|W^{-1} c_j\|_{L^\infty(D \times D)} M_1 \exp\left(-m_0 |a_0| |u(x)| - b_0\right) |u(x)| dx \right) |u(y)| dy \\
& \quad + \int_D \left( \int_{D_2} \sum_{j=1}^J \|W^{-1} c_j\|_{L^\infty(D \times D)} |\sigma(a_j(x, y) u(x) + b_j(x, y))| |u(x)| dx \right) |u(y)| dy \\
& \leq \frac{\alpha}{4} \|u\|_{L^2(D)} + \frac{\alpha}{4} \lambda \|u\|_{L^2(D)} \\
& \leq \frac{\alpha}{2} \|u\|_{L^2(D)}^2.
\end{aligned}$$

740 Hence,

$$\frac{\langle \alpha u + W^{-1} K(u), u \rangle_{L^2(D)}}{\|u\|_{L^2(D)}} \geq \frac{\alpha}{2} \|u\|_{L^2(D)},$$

741 and the function  $u \rightarrow \alpha u + W^{-1} K(u)$  is coercive.  $\square$

### 742 D.3 Proof of Proposition 4

743 *Proof.* (Injectivity) Assume that

$$\sigma(Wu_1 + K(u_1) + b) = \sigma(Wu_2 + K(u_2) + b).$$

744 where  $u_1, u_2 \in L^2(D)^n$ . Since  $\sigma$  is injective and  $W : L^2(D)^n \rightarrow L^2(D)^n$  is bounded linear  
745 bijective, we have

$$u_1 + W^{-1} K(u_1) = u_2 + W^{-1} K(u_2) =: z.$$

746 Since the mapping  $u \mapsto z - W^{-1} K(u)$  is contraction (because  $W^{-1} K$  is contraction), by the Banach  
747 fixed-point theorem, the mapping  $u \mapsto z - W^{-1} K(u)$  admit a unique fixed-point in  $L^2(D)^n$ , which  
748 implies that  $u_1 = u_2$ .

749 (Surjectivity) Since  $\sigma$  is surjective, it is enough to show that  $u \mapsto Wu + K(u) + b$  is surjective.  
750 Let  $z \in L^2(D)^n$ . Since the mapping  $u \mapsto W^{-1} z - W^{-1} b - W^{-1} K(u)$  is contraction, by Banach  
751 fixed-point theorem, there is  $u^* \in L^2(D)^n$  such that

$$u^* = W^{-1} z - W^{-1} b - W^{-1} K(u^*) \iff Wu^* + K(u^*) + b = z.$$

752  $\square$

### 753 D.4 Examples for Proposition 4

754 **Example 4.** We consider the case of  $n = 1$ , and  $D \subset [0, \ell]^d$ . We consider Volterra operators

$$K(u)(x) = \int_D k(x, y, u(x), u(y)) u(y) dy,$$

755 where  $x = (x_1, \dots, x_d)$  and  $y = (y_1, \dots, y_d)$ . We recall that  $K$  is a Volterra operator if

$$k(x, y, t, s) \neq 0 \implies y_j \leq x_j \quad \text{for all } j = 1, 2, \dots, d. \quad (\text{D.4})$$

756 In particular, when  $D = (a, b) \subset \mathbb{R}$  is an interval, the Volterra operators are of the form

$$K(u)(x) = \int_a^x k(x, y, u(x), u(y)) u(y) dy,$$

757 and if  $x$  is considered as a time variable, the Volterra operators are causal in the sense that the value  
758 of  $K(u)(x)$  at the time  $x$  depends only on  $u(y)$  at the times  $y \leq x$ .



759 Assume that  $k(x, y, t, s) \in C(\overline{D} \times \overline{D} \times \mathbb{R} \times \mathbb{R})$  is bounded and uniformly Lipschitz smooth in the  $t$   
 760 and  $s$  variables, that is,  $k \in C(\overline{D} \times \overline{D}; C^{0,1}(\mathbb{R} \times \mathbb{R}))$ .

761 Next, we consider the non-linear operator  $F : L^2(D) \rightarrow L^2(D)$ ,

$$F(u) = u + K(u). \quad (\text{D.5})$$

762 Assume that  $u, w \in L^2(D)$  are such that  $u + K(u) = w + K(w)$ , so that  $w - u = K(u) - K(w)$ .

763 Next, we will show that then  $u = w$ . We denote and  $D(z_1) = D \cap ([0, z_1] \times [0, \ell]^{d-1})$  and

$$\|k\|_{C(\overline{D} \times \overline{D}; C^{0,1}(\mathbb{R} \times \mathbb{R}))} := \sup_{x, y \in D} \|k(x, y, \cdot, \cdot)\|_{C^{0,1}(\mathbb{R} \times \mathbb{R})},$$

764

$$\|k\|_{L^\infty(D \times D \times \mathbb{R} \times \mathbb{R})} := \sup_{x, y \in D, s, t \in \mathbb{R}} |k(x, y, s, t)|.$$

765 Then for  $x \in D(z_1)$  the Volterra property of the kernel implies that

$$\begin{aligned} |u(x) - w(x)| &\leq \int_D |k(x, y, u(x), u(y))u(y) - k(x, y, w(x), w(y))w(y)| dy \\ &\leq \int_{D(z_1)} |k(x, y, u(x), u(y))u(y) - k(x, y, w(x), u(y))u(y)| dy \\ &\quad + \int_{D(z_1)} |k(x, y, w(x), u(y))u(y) - k(x, y, w(x), w(y))u(y)| dy \\ &\quad + \int_{D(z_1)} |k(x, y, w(x), w(y))u(y) - k(x, y, w(x), w(y))w(y)| dy \\ &\leq 2\|k\|_{C(\overline{D} \times \overline{D}; C^{0,1}(\mathbb{R} \times \mathbb{R}))} \|u - w\|_{L^2(D(z_1))} \|u\|_{L^2(D(z_1))} \\ &\quad + \|k\|_{L^\infty(D \times D \times \mathbb{R} \times \mathbb{R})} \|u - w\|_{L^2(D(z_1))} \sqrt{|D(z_1)|}, \end{aligned}$$

766 so that for all  $0 < z_1 < \ell$ ,

$$\begin{aligned} &\|u - w\|_{L^2(D(z_1))}^2 \\ &= \int_0^{z_1} \left( \int_0^\ell \cdots \int_0^\ell \mathbf{1}_{D(x)} |u(x) - w(x)|^2 dx_d dx_{d-1} \dots dx_2 \right) dx_1 \\ &\leq z_1 \ell^{d-1} \left( 2\|k\|_{C(\overline{D} \times \overline{D}; C^{0,1}(\mathbb{R} \times \mathbb{R}))} \|u - w\|_{L^2(D(z_1))} \|u\|_{L^2(D(z_1))} \right. \\ &\quad \left. + \|k\|_{L^\infty(D \times D \times \mathbb{R} \times \mathbb{R})} \|u - w\|_{L^2(D(z_1))} \sqrt{|D(z_1)|} \right)^2 \\ &\leq z_1 \ell^{d-1} \left( \|k\|_{C(\overline{D} \times \overline{D}; C^{0,1}(\mathbb{R} \times \mathbb{R}))} \|u\|_{L^2(D)} + \|k\|_{L^\infty(D \times D \times \mathbb{R} \times \mathbb{R})} \sqrt{|D|} \right)^2 \|u - w\|_{L^2(D(z_1))}^2. \end{aligned}$$

767 Thus, when  $z_1$  is so small that

$$z_1 \ell^{d-1} \left( \|k\|_{C(\overline{D} \times \overline{D}; C^{0,1}(\mathbb{R}^n))} \|u\|_{L^2(D)} + \|k\|_{L^\infty(D \times D \times \mathbb{R} \times \mathbb{R})} \sqrt{|D|} \right)^2 < 1,$$

768 we find that  $\|u - w\|_{L^2(D(z_1))} = 0$ , that is,  $u(x) - w(x) = 0$  for  $x \in D(z_1)$ . Using the same  
 769 arguments as above, we see for all  $k \in \mathbb{N}$  that that if  $u = w$  in  $D(kz_1)$  then  $u = w$  in  $D((k+1)z_1)$ .  
 770 Using induction, we see that  $u = w$  in  $D$ . Hence, the operator  $u \mapsto F(u)$  is injective in  $L^2(D)$ .

771 **Example 5.** We consider derivatives of Volterra operators in the domain  $D \subset [0, \ell]^d$ . Let  $K : L^2(D) \rightarrow L^2(D)$  be a non-linear operator

$$K(u) = \int_D k(x, y, u(y))u(y)dy, \quad (\text{D.6})$$

773 where  $k(x, y, t)$  satisfies (D.4), is bounded, and  $k \in C(\overline{D} \times \overline{D}; C^{0,1}(\mathbb{R} \times \mathbb{R}))$ . Let  $F_1 : L^2(D) \rightarrow L^2(D)$  be

$$F_1(u) = u + K(u). \quad (\text{D.7})$$

775 Then the Fréchet derivative of  $K$  at  $u_0 \in L^2(D)$  to the direction  $w \in L^2(D)$  is

$$DF_1|_{u_0}(w) = w(x) + \int_D k_1(x, y, u_0(y))w(y)dy, \quad (\text{D.8})$$

776 where

$$k_1(x, y, u_0(y)) = u_0(y) \frac{\partial}{\partial t} k(x, y, t) \Big|_{t=u_0(x)} + k(x, y, u_0(y)), \quad (\text{D.9})$$

777 is a Volterra operator satisfying

$$k_1(x, y, t) \neq 0 \implies y_j \leq x_j \quad \text{for all } j = 1, 2, \dots, d. \quad (\text{D.10})$$

778 As seen in Example 4, the operator  $DF_1|_{u_0} : L^2(D) \rightarrow L^2(D)$  is injective.

## 779 E Details of Section 4.2

780 In this appendix, we prove Theorem 3. We recall that in that theorem, we consider the case when  
781  $n = 1$ ,  $D \subset \mathbb{R}$  is a bounded interval, and the operator  $F_1$  is of the form

$$F_1(u)(x) = W(x)u(x) + \int_D k(x, y, u(y))u(y)dy,$$

782 where  $W \in C^1(\overline{D})$  satisfies  $0 < c_1 \leq W(x) \leq c_2$ , the function  $(x, y, s) \mapsto k(x, y, s)$  is in  
783  $C^3(\overline{D} \times \overline{D} \times \mathbb{R})$ , and that in  $\overline{D} \times \overline{D} \times \mathbb{R}$  its three derivatives and the derivatives of  $W$  are all  
784 uniformly bounded by  $c_0$ , that is,

$$\|k\|_{C^3(\overline{D} \times \overline{D} \times \mathbb{R})} \leq c_0, \quad \|W\|_{C^1(\overline{D})} \leq c_0. \quad (\text{E.1})$$

785 We recall that the identical embedding  $H^1(D) \rightarrow L^\infty(D)$  is bounded and compact by Sobolev's  
786 embedding theorem.

787 As we will consider kernels  $k(x, y, u_0(y))$ , we will consider the non-linear operator  $F_1$  mainly as an  
788 operator in a Sobolev space  $H^1(D)$ .

789 The Fréchet derivative of  $F_1$  at  $u_0$  to direction  $w$ , denoted by  $A_{u_0}w = DF_1|_{u_0}(w)$  is given by

$$A_{u_0}w = W(x)w(x) + \int_D k(x, y, u_0(y))w(y)dy + \int_D u_0(y) \frac{\partial k}{\partial u}(x, y, u_0(y))w(y)dy. \quad (\text{E.2})$$

790 The condition (E.1) implies that

$$F_1 : H^1(D) \rightarrow H^1(D), \quad (\text{E.3})$$

791 is a locally Lipschitz smooth function and that the operator

$$A_{u_0} : H^1(D) \rightarrow H^1(D),$$

792 given in (E.2), is defined for all  $u_0 \in C(\overline{D})$  as a bounded linear operator.

793 When  $\mathcal{X}$  is a Banach space, we let  $B_{\mathcal{X}}(0, R) = \{v \in \mathcal{X} : \|v\|_{\mathcal{X}} < R\}$  and  $\overline{B}_{\mathcal{X}}(0, R) = \{v \in \mathcal{X} :$   
794  $\|v\|_{\mathcal{X}} \leq R\}$  be the open and closed balls in  $\mathcal{X}$ , respectively.

795 We consider the Hölder spaces  $C^{n, \alpha}(\overline{D})$  and their image in (leaky) ReLU-type functions. Let  $a \geq 0$   
796 and  $\sigma_a(s) = \text{ReLU}(s) - a \text{ReLU}(-s)$ . We will consider the image of the closed ball of  $C^{1, \alpha}(\overline{D})$  in  
797 the map  $\sigma_a$ , that is  $\sigma_a(\overline{B}_{C^{1, \alpha}(\overline{D})}(0, R)) := \{\sigma_a \circ g \in C(\overline{D}) : \|g\|_{C^{1, \alpha}(\overline{D})} \leq R\}$ .

798 We will below assume that for all  $u_0 \in C(\overline{D})$  the integral operator satisfies

$$A_{u_0} : H^1(D) \rightarrow H^1(D) \text{ is an injective operator.} \quad (\text{E.4})$$

799 This condition is valid when  $K(u)$  is a Volterra operator, see Examples 4 and 5. As the integral  
800 operators  $A_{u_0}$  are Fredholm operators having index zero. This implies that the operators (E.4) are  
801 bijective.

802 The inverse operator  $A_{u_0}^{-1} : H^1(D) \rightarrow H^1(D)$  can be written as

$$A_{u_0}^{-1}v(x) = \widetilde{W}(x)v(x) - \int_D \widetilde{k}_{u_0}(x, y)v(y)dy, \quad (\text{E.5})$$

803 where  $\widetilde{k}_{u_0}, \partial_x \widetilde{k}_{u_0} \in C(\overline{D} \times \overline{D})$  and  $\widetilde{W} \in C^1(\overline{D})$ .

804 We will consider the inverse function of the map  $F_1$  in a set  $\mathcal{Y} \subset \sigma_a(\overline{B}_{C^{1,\alpha}(\overline{D})}(0, R))$  that is a  
 805 compact subset of the Sobolev space  $H^1(D)$ . To this end, we will cover the set  $\mathcal{Y}$  with small balls  
 806  $B_{H^1(D)}(g_j, \varepsilon_0)$ ,  $j = 1, 2, \dots, J$  of  $H^1(D)$ , centered at  $g_j = F_1(v_j)$ , where  $v_j \in H^1(D)$ . We will  
 807 show that when  $g \in B_{H^1(D)}(g_j, 2\varepsilon_0)$ , that is,  $g$  is  $2\varepsilon_1$ -close to the function  $g_j$  in  $H^1(D)$ , the inverse  
 808 map of  $F_1$  can be written as a limit  $(F_1^{-1}(g), g) = \lim_{m \rightarrow \infty} \mathcal{H}_j^{\circ m}(v_j, g)$  in  $H^1(D)^2$ , where

$$\mathcal{H}_j \begin{pmatrix} u \\ g \end{pmatrix} = \begin{pmatrix} u - A_{v_j}^{-1}(F_1(u) - F_1(v_j)) + A_{v_j}^{-1}(g - g_j) \\ g \end{pmatrix}.$$

809 That is, near  $g_j$  we can approximate  $F_1^{-1}$  as a composition  $\mathcal{H}_j^{\circ m}$  of  $2m$  layers of neural operators.

810 To glue the local inverse maps together, we use a partition of unity in the function space  $\mathcal{Y}$  given by  
 811 integral neural operators

$$\Phi_{\vec{i}}(v, w) = \pi_1 \circ \phi_{\vec{i},1} \circ \phi_{\vec{i},2} \circ \dots \circ \phi_{\vec{i},\ell_0}(v, w), \quad \text{where} \quad \phi_{\vec{i},\ell}(v, w) = (F_{y_\ell, s(\vec{i}, \ell), \varepsilon_1}(v, w), w),$$

812  $\pi_1(v, w) = v$  maps a pair  $(v, w)$  to the first function  $v$ , and  $\vec{i}$  belongs to a finite index set  $\mathcal{I} \subset \mathbb{Z}^{\ell_0}$ ,  
 813  $\varepsilon_1 > 0$  and  $y_\ell \in D$  ( $\ell = 1, \dots, \ell_0$ ), where  $s(\vec{i}, \ell) := i_{\ell \varepsilon_1}$ . Here,  $F_{z,s,h}(v, w)$  are integral neural  
 814 operators with distributional kernels

$$F_{z,s,h}(v, w)(x) = \int_D k_{z,s,h}(x, y, v(x), w(y))dy,$$

815 where  $k_{z,s,h}(x, y, v(x), w(y)) = v(x)\mathbf{1}_{[s-\frac{1}{2}h, s+\frac{1}{2}h]}(w(y))\delta(y-z)$ ,  $\mathbf{1}_A$  is the indicator function of  
 816 a set  $A$  and  $y \mapsto \delta(y-z)$  is the Dirac delta distribution at the point  $z \in D$ . Using these, we can  
 817 write the inverse of  $F_1$  at  $g \in \mathcal{Y}$  as

$$F_1^{-1}(g) = \lim_{m \rightarrow \infty} \sum_{\vec{i} \in \mathcal{I}} \Phi_{\vec{i}} \mathcal{H}_j^{\circ m} \begin{pmatrix} v_j(\vec{i}) \\ g \end{pmatrix}, \quad (\text{E.6})$$

818 where  $j(\vec{i}) \in \{1, 2, \dots, J\}$  are suitably chosen and the limit is taken in the norm topology of  $H^1(D)$ .  
 819 This result is summarized by the following theorem, a modified version of Theorem 3 where the  
 820 inverse operator  $F_1^{-1}$  in (E.6) have refined the partition of unity  $\Phi_{\vec{i}}$  so that we use indexes  $\vec{i} \in \mathcal{I} \subset \mathbb{Z}^{\ell_0}$   
 821 instead of  $j \in \{1, \dots, J\}$ .

822 **Theorem 4.** *Assume that  $F_1$  satisfies the above assumptions (E.1) and (E.4) and that  $F_1 : H^1(D) \rightarrow$   
 823  $H^1(D)$  is a bijection. Let  $\mathcal{Y} \subset \sigma_a(\overline{B}_{C^{1,\alpha}(\overline{D})}(0, R))$  be a compact subset the Sobolev space  $H^1(D)$ ,  
 824 where  $\alpha > 0$  and  $a \geq 0$ . Then the inverse of  $F_1 : H^1(D) \rightarrow H^1(D)$  in  $\mathcal{Y}$  can written as a limit (E.6)  
 825 that is, as a limit of integral neural operators.*

826 Observe that Theorem 4 includes the case where  $a = 1$ , in which case  $\sigma_a = Id$  and  $\mathcal{Y} \subset$   
 827  $\sigma_a(\overline{B}_{C^{1,\alpha}(\overline{D})}(0, R)) = \overline{B}_{C^{1,\alpha}(\overline{D})}(0, R)$ . We note that when  $\sigma_a$  is a leaky ReLU-function with  
 828 parameter  $a > 0$ , Theorem 4 can be applied to compute the inverse of  $\sigma_a \circ F_1$  given by  $F_1^{-1} \circ \sigma_a^{-1}$ ,  
 829 where  $\sigma_a^{-1} = \sigma_{1/a}$ . Note that the assumption that  $\mathcal{Y} \subset \sigma_a(\overline{B}_{C^{1,\alpha}(\overline{D})}(0, R))$  makes it possible to  
 830 apply Theorem 4 in the case when one trains deep neural networks having layers  $\sigma_a \circ F_1$  and the  
 831 parameter  $a$  of the leaky ReLU-function is a free parameter which is also trained.

832 *Proof.* As the operator  $F_1$  can be multiplied by function  $W(x)^{-1}$ , it is sufficient to consider the case  
 833 when  $W(x) = 1$ .

834 Below, we use the fact that, because  $D \subset \mathbb{R}$ , Sobolev's embedding theorem yields that the embedding  
 835  $H^1(D) \rightarrow C(\overline{D})$  is bounded and there is  $C_S > 0$  such that

$$\|u\|_{C(\overline{D})} \leq C_S \|u\|_{H^1(D)}. \quad (\text{E.7})$$

836 For clarity, we denote the norm of  $C(\overline{D})$  by  $\|u\|_{L^\infty(D)}$ .

837 Next we consider the Frechet derivatives of  $F_1$ . We recall that the 1st Frechet derivative of  $F_1$  at  $u_0$   
838 is the operator  $A_{u_0}$ . The 2nd Frechet derivative of  $F_1$  at  $u_0$  to directions  $w_1$  and  $w_2$  is

$$\begin{aligned} D^2 F_1|_{u_0}(w_1, w_2) &= \int_D 2 \frac{\partial k}{\partial u}(x, y, u_0(y)) w_1(y) w_2(y) dy + \int_D u_0(y) \frac{\partial k^2}{\partial u^2}(x, y, u_0(y)) w_1(y) w_2(y) dy \\ &= \int_D p(x, y) w_1(y) w_2(y) dy, \end{aligned}$$

839 where

$$p(x, y) = 2 \frac{\partial k}{\partial u}(x, y, u_0(y)) + u_0(y) \frac{\partial k^2}{\partial u^2}(x, y, u_0(y)), \quad (\text{E.8})$$

840 and

$$\frac{\partial}{\partial x} p(x, y) = 2 \frac{\partial^2 k}{\partial u \partial x}(x, y, u_0(y)) + u_0(y) \frac{\partial k^3}{\partial u^2 \partial x}(x, y, u_0(y)). \quad (\text{E.9})$$

841 Thus,

$$\|D^2 F_1|_{u_0}(w_1, w_2)\|_{H^1(D)} \leq 3|D|^{1/2} \|k\|_{C^3(D \times D \times \mathbb{R})} (1 + \|u_0\|_{L^\infty(D)}) \|w_1\|_{L^\infty(D)} \|w_2\|_{L^\infty(D)}. \quad (\text{E.10})$$

842 When we freeze the function  $u$  in kernel  $k$  to be  $u_0$ , we denote

$$K_{u_0} v(x) = \int_D k(x, y, u_0(y)) v(y) dy.$$

843 **Lemma 4.** For  $u_0, u_1 \in C(\overline{D})$  we have

$$\|K_{u_1} - K_{u_0}\|_{L^2(D) \rightarrow H^1(D)} \leq \|k\|_{C^2(D \times D \times \mathbb{R})} |D| \|u_1 - u_0\|_{L^\infty(D)}.$$

844 and

$$\|A_{u_1} - A_{u_0}\|_{L^2(D) \rightarrow H^1(D)} \leq 2 \|k\|_{C^2(D \times D \times \mathbb{R})} |D| (1 + \|u_0\|_{L^\infty(D)}) \|u_1 - u_0\|_{L^\infty(D)}. \quad (\text{E.11})$$

845 *Proof.* Denote

$$\begin{aligned} M_{u_0} v(x) &= \int_D u_0(y) \frac{\partial k}{\partial u}(x, y, u_0(y)) v(y) dy, \\ N_{u_1, u_2} v(x) &= \int_D u_1(y) \frac{\partial k}{\partial u}(x, y, u_2(y)) v(y) dy. \end{aligned}$$

846 We have

$$M_{u_2} v - M_{u_1} v = (N_{u_2, u_2} v - N_{u_2, u_1} v) + (N_{u_2, u_1} v - N_{u_1, u_1} v).$$

847 By Schur's test for continuity of integral operators,

$$\begin{aligned} \|K_{u_0}\|_{L^2(D) \rightarrow L^2(D)} &\leq \left( \sup_{x \in D} \int_D |k(x, y, u_0(y))| dy \right)^{1/2} \left( \sup_{y \in D} \int_D |k(x, y, u_0(y))| dx \right)^{1/2} \\ &\leq \|k\|_{C^0(D \times D \times \mathbb{R})}, \end{aligned}$$

848 and

$$\begin{aligned} &\|M_{u_0}\|_{L^2(D) \rightarrow L^2(D)} \\ &\leq \left( \sup_{x \in D} \int_D |u_0(y) \frac{\partial k}{\partial u}(x, y, u_0(y))| dy \right)^{1/2} \left( \sup_{y \in D} \int_D |u_0(y) \frac{\partial k}{\partial u}(x, y, u_0(y))| dx \right)^{1/2} \\ &\leq \|k\|_{C^1(D \times D \times \mathbb{R})} \|u\|_{C(\overline{D})}, \end{aligned}$$

849 and

$$\begin{aligned}
& \|K_{u_2} - K_{u_1}\|_{L^2(D) \rightarrow L^2(D)} \\
& \leq \left( \sup_{x \in D} \int_D |k(x, y, u_2(y)) - k(x, y, u_1(y))| dy \right)^{1/2} \\
& \quad \times \left( \sup_{y \in D} \int_D |k(x, y, u_2(y)) - k(x, y, u_1(y))| dx \right)^{1/2} \\
& \leq \left( \sup_{x \in D} \int_D \|k\|_{C^1(D \times D \times \mathbb{R})} |u_2(y) - u_1(y)| dy \right)^{1/2} \\
& \quad \times \left( \sup_{y \in D} \int_D \|k\|_{C^1(D \times D \times \mathbb{R})} |u_2(y) - u_1(y)| dx \right)^{1/2} \\
& \leq \|k\|_{C^1(D \times D \times \mathbb{R})} \left( \sup_{x \in D} \int_D |u_2(y) - u_1(y)| dy \right)^{1/2} \left( \sup_{y \in D} \int_D |u_2(y) - u_1(y)| dx \right)^{1/2} \\
& \leq \|k\|_{C^1(D \times D \times \mathbb{R})} \left( |D|^{1/2} \|u_2 - u_1\|_{L^2(D)} \right)^{1/2} \left( |D| \sup_{y \in D} |u_2(y) - u_1(y)| \right)^{1/2} \\
& \leq \|k\|_{C^1(D \times D \times \mathbb{R})} |D|^{3/4} \|u_2 - u_1\|_{L^2(D)}^{1/2} \|u_2 - u_1\|_{L^\infty(D)}^{1/2} \\
& \leq \|k\|_{C^1(D \times D \times \mathbb{R})} |D| \|u_2 - u_1\|_{L^\infty(D)},
\end{aligned}$$

850 and

$$\begin{aligned}
& \|N_{u_2, u_2} - N_{u_2, u_1}\|_{L^2(D) \rightarrow L^2(D)} \\
& \leq \left( \sup_{x \in D} \int_D |u_2(y)k(x, y, u_2(y)) - u_2(y)k(x, y, u_1(y))| dy \right)^{1/2} \\
& \quad \times \left( \sup_{y \in D} \int_D |u_2(y)k(x, y, u_2(y)) - u_2(y)k(x, y, u_1(y))| dx \right)^{1/2} \\
& \leq \|k\|_{C^1(D \times D \times \mathbb{R})} |D|^{3/4} \|u_2\|_{C^0(D)} \|u_2 - u_1\|_{L^2(D)}^{1/2} \|u_2 - u_1\|_{L^\infty(D)}^{1/2} \\
& \leq \|k\|_{C^1(D \times D \times \mathbb{R})} |D| \cdot \|u_2\|_{C^0(D)} \|u_2 - u_1\|_{L^\infty(D)},
\end{aligned}$$

851 and

$$\begin{aligned}
& \|N_{u_2, u_1} - N_{u_1, u_1}\|_{L^2(D) \rightarrow L^2(D)} \\
& \leq \left( \sup_{x \in D} \int_D |(u_2(y) - u_1(y))k(x, y, u_1(y))| dy \right)^{1/2} \\
& \quad \times \left( \sup_{y \in D} \int_D |(u_2(y) - u_1(y))k(x, y, u_1(y))| dx \right)^{1/2} \\
& \leq \|k\|_{C^0(D \times D \times \mathbb{R})} |D| \cdot \|u_2 - u_1\|_{L^\infty(D)},
\end{aligned}$$

852 so that

$$\begin{aligned}
& \|M_{u_2} - M_{u_1}\|_{L^2(D) \rightarrow L^2(D)} \\
& \leq \|k\|_{C^1(D \times D \times \mathbb{R})} |D| (1 + \|u_2\|_{C^0(D)}) \|u_2 - u_1\|_{L^\infty(D)}.
\end{aligned}$$

853 Also, when  $D_x v = \frac{dv}{dx}$ ,

$$\begin{aligned}
& \|D_x \circ K_{u_0}\|_{L^2(D) \rightarrow L^2(D)} \\
& \leq \left( \sup_{x \in D} \int_D |D_x k(x, y, u_0(y))| dy \right)^{1/2} \left( \sup_{y \in D} \int_D |D_x k(x, y, u_0(y))| dx \right)^{1/2} \\
& \leq \|k\|_{C^1(D \times D \times \mathbb{R})},
\end{aligned}$$

854 and

$$\begin{aligned}
& \|D_x \circ K_{u_1} - D_x \circ K_{u_0}\|_{L^2(D) \rightarrow L^2(D)} \\
& \leq \left( \sup_{x \in D} \int_D |D_x k(x, y, u_1(y)) - D_x k(x, y, u_0(y))| dy \right)^{1/2} \\
& \quad \times \left( \sup_{y \in D} \int_D |D_x k(x, y, u_1(y)) - D_x k(x, y, u_0(y))| dx \right)^{1/2} \\
& \leq \left( \sup_{x \in D} \int_D \|k\|_{C^2(D \times D \times \mathbb{R})} |u_1(y) - u_0(y)| dy \right)^{1/2} \\
& \quad \times \left( \sup_{y \in D} \int_D \|k\|_{C^2(D \times D \times \mathbb{R})} |u_1(y) - u_0(y)| dx \right)^{1/2} \\
& \leq \|k\|_{C^2(D \times D \times \mathbb{R})} \left( \sup_{x \in D} \int_D |u_1(y) - u_0(y)| dy \right)^{1/2} \left( \sup_{y \in D} \int_D |u_1(y) - u_0(y)| dx \right)^{1/2} \\
& \leq \|k\|_{C^2(D \times D \times \mathbb{R})} \left( |D|^{1/2} \|u_1 - u_0\|_{L^2(D)} \right)^{1/2} \left( |D| \sup_{y \in D} |u_1(y) - u_0(y)| \right)^{1/2} \\
& \leq \|k\|_{C^2(D \times D \times \mathbb{R})} |D|^{3/4} \|u_1 - u_0\|_{L^2(D)}^{1/2} \|u_1 - u_0\|_{L^\infty(D)}^{1/2} \\
& \leq \|k\|_{C^2(D \times D \times \mathbb{R})} |D| \|u_1 - u_0\|_{L^\infty(D)}.
\end{aligned}$$

855 Thus,

$$\|K_{u_0}\|_{L^2(D) \rightarrow H^1(D)} \leq \|k\|_{C^1(D \times D \times \mathbb{R})},$$

856 and

$$\|M_{u_0}\|_{L^2(D) \rightarrow H^1(D)} \leq \|u_0\|_{C^0(D)} \|k\|_{C^1(D \times D \times \mathbb{R})},$$

857 and

$$\|K_{u_1} - K_{u_0}\|_{L^2(D) \rightarrow H^1(D)} \leq \|k\|_{C^2(D \times D \times \mathbb{R})} |D| \|u_1 - u_0\|_{L^\infty(D)}.$$

858 Similarly,

$$\|M_{u_1} - M_{u_0}\|_{L^2(D) \rightarrow H^1(D)} \leq \|k\|_{C^2(D \times D \times \mathbb{R})} |D| (1 + \|u_2\|_{C^0(D)}) \|u_1 - u_0\|_{L^\infty(D)}.$$

859 As  $A_{u_1} = K_{u_1} + M_{u_1}$ , the claim follows.  $\square$

860 As the embedding  $H^1(D) \rightarrow C(\overline{D})$  is bounded and has norm  $C_S$ , Lemma 4 implies that for all  
861  $R > 0$  there is

$$C_L(R) = 2\|k\|_{C^2(D \times D \times \mathbb{R})} |D| (1 + C_S R),$$

862 such that the map,

$$u_0 \mapsto DF_1|_{u_0}, \quad u_0 \in \overline{B}_{H^1}(0, R), \tag{E.12}$$

863 is a Lipschitz map  $\overline{B}_{H^1}(0, R) \rightarrow \mathcal{L}(H^1(D), H^1(D))$  with Lipschitz constant  $C_L(R)$ , that is,

$$\|DF_1|_{u_1} - DF_1|_{u_2}\|_{H^1(D) \rightarrow H^1(D)} \leq C_L(R) \|u_1 - u_2\|_{H^1(D)}. \tag{E.13}$$

864 As  $u_0 \mapsto A_{u_0} = DF_1|_{u_0}$  is continuous, the inverse  $A_{u_0}^{-1} : H^1(D) \rightarrow H^1(D)$  exists for all  
865  $u_0 \in C(\overline{D})$ , and the embedding  $H^1(D) \rightarrow C(\overline{D})$  is compact, we have that for all  $R > 0$  there is  
866  $C_B(R) > 0$  such that

$$\|A_{u_0}^{-1}\|_{H^1(D) \rightarrow H^1(D)} \leq C_B(R), \quad \text{for all } u_0 \in \overline{B}_{H^1}(0, R). \tag{E.14}$$

867 Let  $R_1, R_2 > 0$  be such that  $\mathcal{Y} \subset \overline{B}_{H^1}(0, R_1)$  and  $X = F_1^{-1}(\mathcal{Y}) \subset \overline{B}_{H^1}(0, R_2)$ . Below, we denote  
868  $C_L = C_L(2R_2)$  and  $C_B = C_B(R_2)$ .

869 Next we consider inverse of  $F_1$  in  $\mathcal{Y}$ . To this end, let us consider  $\varepsilon_0 > 0$ , which we choose later to be  
870 small enough. As  $\mathcal{Y} \subset \overline{B}_{H^1}(0, R)$  is compact there are a finite number of elements  $g_j = F_1(v_j) \in \mathcal{Y}$ ,  
871 where  $v_j \in X, j = 1, 2, \dots, J$  such that

$$\mathcal{Y} \subset \bigcup_{j=1}^J B_{H^1(D)}(g_j, \varepsilon_0).$$

872 We observe that for  $u_0, u_1 \in X$ ,

$$A_{u_1}^{-1} - A_{u_0}^{-1} = A_{u_1}^{-1}(A_{u_1} - A_{u_0})A_{u_0}^{-1},$$

873 and hence the Lipschitz constant of  $A^{-1} : u \mapsto A_u^{-1}, X \rightarrow \mathcal{L}(H^1(D), H^1(D))$  satisfies

$$\text{Lip}(A^{-1}) \leq C_A = C_B^2 C_L, \quad (\text{E.15})$$

874 see (E.11).

875 Let us consider a fixed  $j$  and  $g_j \in \mathcal{Y}$ . When  $g$  satisfies

$$\|g - g_j\|_{H^1(D)} < 2\varepsilon_0, \quad (\text{E.16})$$

876 the equation

$$F_1(u) = g, \quad u \in X,$$

877 is equivalent to the fixed point equation

$$u = u - A_{v_j}^{-1}(F_1(u) - F_1(v_j)) + A_{v_j}^{-1}(g - g_j),$$

878 that is equivalent to the fixed point equation

$$H_j(u) = u,$$

879 for the function  $H_j : H^1(D) \rightarrow H^1(D)$ ,

$$H_j(u) = u - A_{v_j}^{-1}(F_1(u) - F_1(v_j)) + A_{v_j}^{-1}(g - g_j).$$

880 Note that  $H_j$  depends on  $g$ , and thus we later denote  $H_j = H_j^g$ . We observe that

$$H_j(v_j) = v_j + A_{v_j}^{-1}(g - g_j). \quad (\text{E.17})$$

881 Let  $u, v \in \overline{B}_{H^1}(0, 2R_2)$ . We have

$$F_1(u) = F_1(v) + A_v(u - v) + B_v(u - v), \quad \|B_v(u - v)\| \leq C_0 \|u - v\|^2,$$

882 where, see (E.10),

$$C_0 = 3|D|^{1/2} \|k\|_{C^3(D \times D \times \mathbb{R})} (1 + 2C_S R_2) C_S^2,$$

883 so that for  $u_1, u_2 \in \overline{B}_{H^1}(0, 2R_2)$ ,

$$\begin{aligned} & u_1 - u_2 - A_{v_j}^{-1}(F_1(u_1) - F_1(u_2)) \\ = & u_1 - u_2 - A_{u_2}^{-1}(F_1(u_1) - F_1(u_2)) - (A_{u_2}^{-1} - A_{v_j}^{-1})(F_1(u_1) - F_1(u_2)), \end{aligned}$$

884 and

$$\begin{aligned} & \|u_1 - u_2 - A_{u_2}^{-1}(F_1(u_1) - F_1(u_2))\|_{H^1(D)} \\ = & \|A_{u_2}^{-1}(B_{u_2}(u_1 - u_2))\|_{H^1(D)} \\ \leq & \|A_{u_2}^{-1}\|_{H^1(D) \rightarrow H^1(D)} \|B_{u_2}(u_1 - u_2)\|_{H^1(D)} \\ \leq & \|A_{u_2}^{-1}\|_{H^1(D) \rightarrow H^1(D)} C_0 \|u_1 - u_2\|_{H^1(D)}^2, \\ \leq & C_B C_0 \|u_1 - u_2\|_{H^1(D)}^2, \end{aligned}$$

885 and

$$\begin{aligned}
& \| (A_{u_2}^{-1} - A_{v_j}^{-1})(F_1(u_1) - F_1(u_2)) \|_{H^1(D)} \\
& \leq \| A_{u_2}^{-1} - A_{v_j}^{-1} \|_{H^1(D) \rightarrow H^1(D)} \| F_1(u_1) - F_1(u_2) \|_{H^1(D)} \\
& \leq \text{Lip}_{\overline{B}_{H^1}(0, 2R_2) \rightarrow H^1(D)}(A_{\cdot}^{-1}) \| u_2 - v_j \| \text{Lip}_{\overline{B}_{H^1}(0, 2R_2) \rightarrow H^1(D)}(F_1) \| u_2 - u_1 \|_{H^1(D)} \\
& \leq C_A \| u_2 - v_j \| (C_B + 4C_0R_2) \| u_2 - u_1 \|_{H^1(D)},
\end{aligned}$$

886 see (E.2), and hence, when  $\|u - v_j\| \leq r \leq R_2$ ,

$$\begin{aligned}
& \| H_j(u_1) - H_j(u_2) \|_{H^1(D)} \\
& \leq \| u_1 - u_2 - A_{v_j}^{-1}(F_1(u_1) - F_1(u_2)) \|_{H^1(D)} \\
& \leq \| u_1 - u_2 - A_{u_2}^{-1}(F_1(u_1) - F_1(u_2)) \|_{H^1(D)} + \| (A_{u_2}^{-1} - A_{v_j}^{-1})(F_1(u_1) - F_1(u_2)) \|_{H^1(D)} \\
& \leq \left( C_B C_0 (\|u_1 - v_j\|_{H^1(D)} + \|u_2 - v_j\|_{H^1(D)}) + C_A (C_B + 4C_0R_2) \|u_2 - v_j\| \right) \cdot \|u_2 - u_1\|_{H^1(D)} \\
& \leq C_H r \|u_2 - u_1\|_{H^1(D)},
\end{aligned}$$

887 where

$$C_H = 2C_B C_0 + C_A (C_B + 4C_0R_2).$$

888 We now choose

$$r = \min\left(\frac{1}{2C_H}, R_2\right).$$

889 We consider

$$\varepsilon_0 \leq \frac{1}{8C_B} \frac{1}{2C_H}.$$

890 Then, we have

$$r \geq 2C_B \varepsilon_0 / (1 - C_H r).$$

891 Then, we have that  $\text{Lip}_{\overline{B}_{H^1}(0, 2R_2) \rightarrow H^1(D)}(H_j) \leq a = C_H r < \frac{1}{2}$ , and

$$r \geq \|A_{v_j}^{-1}\|_{H^1(D) \rightarrow H^1(D)} \|g - g_j\|_{H^1(D)} / (1 - a),$$

892 and for all  $u \in \overline{B}_{H^1}(0, R_2)$  such that  $\|u - v_j\| \leq r$ , we have  $\|A_{v_j}^{-1}(g - g_j)\|_{H^1(D)} \leq (1 - a)r$ .

893 Then,

$$\begin{aligned}
\|H_j(u) - v_j\|_{H^1(D)} & \leq \|H_j(u) - H_j(v_j)\|_{H^1(D)} + \|H_j(v_j) - v_j\|_{H^1(D)} \\
& \leq a \|u - v_j\|_{H^1(D)} + \|v_j + A_{v_j}^{-1}(g - g_j) - v_j\|_{H^1(D)} \\
& \leq ar + \|A_{v_j}^{-1}(g - g_j)\|_{H^1(D)} \leq r,
\end{aligned}$$

894 that is,  $H_j$  maps  $\overline{B}_{H^1(D)}(v_j, r)$  to itself. By Banach fixed point theorem,  $H_j : \overline{B}_{H^1(D)}(v_j, r) \rightarrow \overline{B}_{H^1(D)}(v_j, r)$  has a fixed point.

896 Let us denote

$$\mathcal{H}_j \begin{pmatrix} u \\ g \end{pmatrix} = \begin{pmatrix} H_j^g(u) \\ g \end{pmatrix} = \begin{pmatrix} u - A_{v_j}^{-1}(F_1(u) - F_1(v_j)) + A_{v_j}^{-1}(g - g_j) \\ g \end{pmatrix}.$$

897 By the above, when we choose  $\varepsilon_0$  to have a value

$$\varepsilon_0 < \frac{1}{8C_B} \frac{1}{2C_H},$$

898 the map  $F_1$  has a right inverse map  $\mathcal{R}_j$  in  $B_{H^1}(g_j, 2\varepsilon_0)$ , that is,

$$F_1(\mathcal{R}_j(g)) = g, \quad \text{for } g \in B_{H^1}(g_j, 2\varepsilon_0), \quad (\text{E.18})$$



899 and by Banach fixed point theorem it is given by the limit

$$\mathcal{R}_j(g) = \lim_{m \rightarrow \infty} w_{j,m}, \quad g \in B_{H^1}(g_j, 2\varepsilon_0), \quad (\text{E.19})$$

900 in  $H^1(D)$ , where

$$w_{j,0} = v_j, \quad (\text{E.20})$$

$$w_{j,m+1} = H_j^g(w_{j,m}). \quad (\text{E.21})$$

901 We can write for  $g \in B_{H^1}(g_j, 2\varepsilon_0)$ ,

$$\begin{pmatrix} \mathcal{R}_j(g) \\ g \end{pmatrix} = \lim_{m \rightarrow \infty} \mathcal{H}_j^{\circ m} \begin{pmatrix} v_j \\ g \end{pmatrix},$$

902 where the limit takes space in  $H^1(D)^2$  and

$$\mathcal{H}_j^{\circ m} = \mathcal{H}_j \circ \mathcal{H}_j \circ \dots \circ \mathcal{H}_j, \quad (\text{E.22})$$

903 is the composition of  $m$  operators  $\mathcal{H}_j$ . This implies that  $\mathcal{R}_j$  can be written as a limit of finite iterations  
904 of neural operators  $H_j$  (we will consider how the operator  $A_{v_j}^{-1}$  can be written as a neural operator  
905 below).

906 As  $\mathcal{Y} \subset \sigma_a(\overline{B}_{C^{1,\alpha}(\overline{D})}(0, R))$ , there are finite number of points  $y_\ell \in D$ ,  $\ell = 1, 2, \dots, \ell_0$  and  $\varepsilon_1 > 0$   
907 such that the sets

$$Z(i_1, i_2, \dots, i_{\ell_0}) = \{g \in Y : (i_\ell - \frac{1}{2})\varepsilon_1 \leq g(y_\ell) < (i_\ell + \frac{1}{2})\varepsilon_1, \text{ for all } \ell\},$$

908 where  $i_1, i_2, \dots, i_{\ell_0} \in \mathbb{Z}$ , satisfy the condition

$$(\text{E.23})$$

If  $(Z(i_1, i_2, \dots, i_{\ell_0}) \cap \mathcal{Y}) \cap B_{H^1(D)}(g_j, \varepsilon_0) \neq \emptyset$  then  $Z(i_1, i_2, \dots, i_{\ell_0}) \cap \mathcal{Y} \subset B_{H^1(D)}(g_j, 2\varepsilon_0)$ .

909 To show (E.23), we will below use the mean value theorem for function  $g = \sigma_a \circ v \in \mathcal{Y}$ , where  
910  $v \in C^{1,\alpha}(\overline{D})$ . First, let us consider the case when the parameter  $a$  of the leaky ReLU function  $\sigma_a$   
911 is strictly positive. Without loss of generality, we can assume that  $D = [0, 1]$  and  $y_\ell = h\ell$ , where  
912  $h = 1/\ell_0$  and  $\ell = 0, 1, \dots, \ell_0$ . We consider  $g \in \mathcal{Y} \cap Z(i_1, i_2, \dots, i_{\ell_0}) \subset \sigma_a(\overline{B}_{C^{1,\alpha}(\overline{D})}(0, R))$  of  
913 the form  $g = \sigma_a \circ v$ . As  $a$  is non-zero, the inequality  $(i_\ell - \frac{1}{2})\varepsilon_1 \leq g(y_\ell) < (i_\ell + \frac{1}{2})\varepsilon_1$  is equivalent  
914 to  $\sigma_{1/a}((i_\ell - \frac{1}{2})\varepsilon_1) \leq v(y_\ell) < \sigma_{1/a}((i_\ell + \frac{1}{2})\varepsilon_1)$ , and thus

$$\sigma_{1/a}(i_\ell \varepsilon_1) - A\varepsilon_1 \leq v(y_\ell) < \sigma_{1/a}(i_\ell \varepsilon_1) + A\varepsilon_1, \quad (\text{E.24})$$

915 where  $A = \max(1, a, 1/a)$ , that is, for  $g = \sigma_a(v) \in Z(i_1, i_2, \dots, i_{\ell_0})$  the values  $v(y_\ell)$  are known  
916 within small errors. By applying mean value theorem on the interval  $[(\ell_1 - 1)h, \ell_1 h]$  for function  $v$   
917 we see that there is  $x' \in [(\ell_1 - 1)h, \ell_1 h]$  such that

$$\frac{dv}{dx}(x') = \frac{v(\ell_1 h) - v((\ell_1 - 1)h)}{h},$$

918 and thus by (E.24),

$$\left| \frac{dv}{dx}(x') - d_{\ell, \vec{i}} \right| \leq 2A \frac{\varepsilon_1}{h}, \quad (\text{E.25})$$

919 where

$$d_{\ell, \vec{i}} = \frac{1}{h}(\sigma_{1/a}(i_\ell \varepsilon_1) - \sigma_{1/a}((i_\ell - 1)\varepsilon_1)), \quad (\text{E.26})$$

920 Observe that these estimates are useful when  $\varepsilon_1$  is much smaller than  $h$ . As  $g = \sigma_a \circ v \in \mathcal{Y} \subset$   
921  $\sigma_a(\overline{B}_{C^{1,\alpha}(\overline{D})}(0, R))$ , we have  $v \in \overline{B}_{C^{0,\alpha}(\overline{D})}(0, R)$ , so that  $\frac{dv}{dx} \in \overline{B}_{C^{0,\alpha}(\overline{D})}(0, R)$  satisfies (E.25)  
922 implies that

$$\left| \frac{dv}{dx}(x) - d_{\ell, \vec{i}} \right| \leq 2A \frac{\varepsilon_1}{h} + Rh^\alpha, \quad \text{for all } x \in [(\ell_1 - 1)h, \ell_1 h]. \quad (\text{E.27})$$

923 Moreover, (E.24) and  $v \in \overline{B}_{C^{1,\alpha}(\overline{D})}(0, R)$  imply

$$|v(x) - \sigma_{1/a}(i_\ell \varepsilon_1)| < A\varepsilon_1 + Rh, \quad (\text{E.28})$$

924 for all  $x \in [(\ell_1 - 1)h, \ell_1 h]$ .

925 Let  $\varepsilon_2 = \varepsilon_2/A$ . When we first choose  $\ell_0$  to be large enough (so that  $h = 1/\ell_0$  is small) and then  $\varepsilon_1$   
926 to be small enough, we may assume that

$$\max(2A\frac{\varepsilon_1}{h} + Rh^\alpha, A\varepsilon_1 + Rh) < \frac{1}{8}\varepsilon_2. \quad (\text{E.29})$$

927 Then for any two functions  $g, g' \in \mathcal{Y} \cap Z(i_1, i_2, \dots, i_{\ell_0}) \subset \sigma_a(\overline{B}_{C^{1,\alpha}(\overline{D})}(0, R))$  of the form  
928  $g = \sigma_a \circ v, g' = \sigma_a \circ v'$  the inequalities (E.27) and (E.28) imply

$$\begin{aligned} \left| \frac{dv}{dx}(x) - \frac{dv'}{dx}(x) \right| &< \frac{1}{4}\varepsilon_2, \\ |v(x) - v'(x)| &< \frac{1}{4}\varepsilon_2, \end{aligned} \quad (\text{E.30})$$

929 for all  $x \in D$ . As  $v, v' \in \overline{B}_{C^{1,\alpha}(\overline{D})}(0, R)$ , this implies

$$\|v - v'\|_{C^1(\overline{D})} < \frac{1}{2}\varepsilon_2,$$

930 As the embedding  $C^1(\overline{D}) \rightarrow H^1(D)$  is continuous and has norm less than 2 on the interval  $D = [0, 1]$ ,  
931 we see that

$$\|v - v'\|_{H^1(\overline{D})} < \varepsilon_2,$$

932 and thus

$$\|g - g'\|_{H^1(\overline{D})} < A\varepsilon_2 = \varepsilon_0.$$

933 Hence, the property (E.23) follows.

934 We next consider the case when the parameter  $a$  of the leaky relu function  $\sigma_a$  is zero. Again, we  
935 assume that  $D = [0, 1]$  and  $y_\ell = h\ell$ , where  $h = 1/\ell_0$  and  $\ell = 0, 1, \dots, \ell_0$ . We consider  $g \in \mathcal{Y} \cap$   
936  $Z(i_1, i_2, \dots, i_{\ell_0}) \subset \sigma_a(\overline{B}_{C^{1,\alpha}(\overline{D})}(0, R))$  of the form  $g = \sigma_a(v)$  and an interval  $[\ell_1 h, (\ell_1 + 1)h] \subset D$ ,  
937 where  $1 \leq \ell_1 \leq \ell_0 - 2$ . We will consider four cases. First, if  $g$  does not obtain the value zero on the  
938 interval  $[\ell_1 h, (\ell_1 + 1)h]$  the mean value theorem implies that there is  $x' \in [\ell_1 h, (\ell_1 + 1)h]$  such that  
939  $\frac{dg}{dx}(x') = \frac{dv}{dx}(x')$  is equal to  $d = (g(\ell_1 h) - g((\ell_1 - 1)h))/h$ . Second, if  $g$  does not obtain the value  
940 zero on either of the intervals  $[(\ell_1 - 1)h, \ell_1 h]$  or  $[(\ell_1 + 1)h, (\ell_1 + 2)h]$ , we can use the mean value  
941 theorem to estimate the derivatives of  $g$  and  $v$  at some point of these intervals similarly to the first case.  
942 Third, if  $g$  does not vanish identically on the interval  $[\ell_1 h, (\ell_1 + 1)h]$  but it obtains the value zero on the  
943 both intervals  $[(\ell_1 - 1)h, \ell_1 h]$  and  $[(\ell_1 + 1)h, (\ell_1 + 2)h]$ , the function  $v$  has two zeros on the interval  
944  $[(\ell_1 - 1)h, (\ell_1 + 2)h]$  and the mean value theorem implies that there is  $x' \in [(\ell_1 - 1)h, (\ell_1 + 2)h]$   
945 such that  $\frac{dv}{dx}(x') = 0$ . Fourth, if none of the above cases are valid,  $g$  vanishes identically on the  
946 interval  $[\ell_1 h, (\ell_1 + 1)h]$ . In all these cases the fact that  $\|v\|_{C^{1,\alpha}(\overline{D})} \leq R$  implies that the derivative  
947 of  $g$  can be estimated on the whole interval  $[\ell_1 h, (\ell_1 + 1)h]$  within a small error. Using these  
948 observations we see for any  $\varepsilon_2, \varepsilon_3 > 0$  that if  $y_\ell \in D = [d_1, d_2] \subset \mathbb{R}$ ,  $\ell = 1, 2, \dots, \ell_0$  are a  
949 sufficiently dense grid in  $D$  and  $\varepsilon_1$  to be small enough, then the derivatives of any two functions  
950  $g, g' \in \mathcal{Y} \cap Z(i_1, i_2, \dots, i_{\ell_0}) \subset \sigma_a(\overline{B}_{C^{1,\alpha}(\overline{D})}(0, R))$  of the form  $g = \sigma_a(v), g' = \sigma_a(v')$  satisfy  
951  $\|g - g'\|_{H^1([d_1 + \varepsilon_3, d_2 - \varepsilon_3])} < \varepsilon_2$ . As the embedding  $C^1([d_1 + \varepsilon_3, d_2 - \varepsilon_3]) \rightarrow H^1([d_1 + \varepsilon_3, d_2 - \varepsilon_3])$   
952 is continuous,

$$\begin{aligned} \|\sigma_a(v)\|_{H^1([d_1, d_1 + \varepsilon_3])} &\leq c_a \|v\|_{C^{1,\alpha}(\overline{D})} \sqrt{\varepsilon_3}, \\ \|\sigma_a(v)\|_{H^1([d_2 - \varepsilon_3, d_2])} &\leq c_a \|v\|_{C^{1,\alpha}(\overline{D})} \sqrt{\varepsilon_3}, \end{aligned}$$

953 and  $\varepsilon_2$  and  $\varepsilon_3$  can be chosen to be arbitrarily small, we see that the property (E.23) follows. Thus the  
954 property (E.23) is shown in all cases.

955 By our assumptions  $\mathcal{Y} \subset \sigma_a(B_{C^{1,\alpha}(\overline{D})}(0, R))$  and hence  $g \in \mathcal{Y}$  implies that  $\|g\|_{C(\overline{D})} \leq AR$ . This  
 956 implies that  $\mathcal{Y} \cap Z(i_1, i_2, \dots, i_{\ell_0})$  is empty if there is  $\ell$  such that  $|i_\ell| > 2AR/\varepsilon_1 + 1$ . Thus, there is  
 957 a finite set  $\mathcal{I} \subset \mathbb{Z}^{\ell_0}$  such that

$$\mathcal{Y} \subset \bigcup_{\vec{i} \in \mathcal{I}} Z(\vec{i}), \quad (\text{E.31})$$

$$Z(\vec{i}) \cap \mathcal{Y} \neq \emptyset, \quad \text{for all } \vec{i} \in \mathcal{I}, \quad (\text{E.32})$$

958 where we use notation  $\vec{i} = (i_1, i_2, \dots, i_{\ell_0}) \in \mathbb{Z}^{\ell_0}$ . On the other hand, we have chosen  $g_j \in \mathcal{Y}$   
 959 such that  $B_{H^1(D)}(g_j, \varepsilon_0)$ ,  $j = 1, \dots, J$  cover  $\mathcal{Y}$ . This implies that for all  $\vec{i} \in \mathcal{I}$  there is  $j = j(\vec{i}) \in$   
 960  $\{1, 2, \dots, J\}$  such that there exists  $g \in Z(\vec{i}) \cap B_{H^1(D)}(g_j, \varepsilon_0)$ . By (E.23), this implies that

$$Z(\vec{i}) \subset B_{H^1(D)}(g_{j(\vec{i})}, 2\varepsilon_0). \quad (\text{E.33})$$

961 Thus, we see that  $Z(\vec{i})$ ,  $\vec{i} \in \mathcal{I}$  is a disjoint covering of  $\mathcal{Y}$ , and by (E.33), in each set  $Z(\vec{i}) \cap \mathcal{Y}$ ,  $\vec{i} \in \mathcal{I}$   
 962 the map  $g \rightarrow \mathcal{R}_j(g)$  we have constructed a right inverse of the map  $F_1$ .

963 Below, we denote  $s(\vec{i}, \ell) = i_\ell \varepsilon_1$ . Next we construct a partition of unity in  $\mathcal{Y}$  using maps

$$F_{z,s,h}(v, w)(x) = \int_D k_{z,s,h}(x, y, v(x), w(y)) dy,$$

964 where

$$k_{z,s,h}(x, y, v(x), w(y)) = v(x) \mathbf{1}_{[s-\frac{1}{2}h, s+\frac{1}{2}h)}(w(y)) \delta(y-z).$$

965 Then,

$$F_{z,s,h}(v, w)(x) = \begin{cases} v(x), & \text{if } -\frac{1}{2}h \leq w(z) - s < \frac{1}{2}h, \\ 0, & \text{otherwise.} \end{cases}$$

966 Next, for all  $\vec{i} \in \mathcal{I}$  we define the operator  $\Phi_{\vec{i}} : H^1(D) \times \mathcal{Y} \rightarrow H^1(D)$ ,

$$\Phi_{\vec{i}}(v, w) = \pi_1 \circ \phi_{\vec{i},1} \circ \phi_{\vec{i},2} \circ \dots \circ \phi_{\vec{i},\ell_0}(v, w),$$

where  $\phi_{\vec{i},\ell} : H^1(D) \times \mathcal{Y} \rightarrow H^1(D) \times \mathcal{Y}$  are the maps

$$\phi_{\vec{i},\ell}(v, w) = (F_{y_\ell, s(\vec{i}, \ell), \varepsilon_1}(v, w), w),$$

967 and  $\pi_1(v, w) = v$  maps a pair  $(v, w)$  to the first function  $v$ . It satisfies

$$\Phi_{\vec{i}}(v, w) = \begin{cases} v, & \text{if } -\frac{1}{2}\varepsilon_1 \leq w(y_\ell) - s(\vec{i}, \ell) < \frac{1}{2}\varepsilon_1 \text{ for all } \ell, \\ 0, & \text{otherwise.} \end{cases}$$

968 Observe that here  $s(\vec{i}, \ell) = i_\ell \varepsilon_1$  is close to the value  $g_{j(\vec{i})}(y_\ell)$ . Now we can write for  $g \in Y$

$$F_1^{-1}(g) = \sum_{\vec{i} \in \mathcal{I}} \Phi_{\vec{i}}(\mathcal{R}_{j(\vec{i})}(g), g),$$

969 with suitably chosen  $j(\vec{i}) \in \{1, 2, \dots, J\}$ .

Let us finally consider  $A_{u_0}^{-1}$  where  $u_0 \in C(\overline{D})$ . Let us denote

$$\tilde{K}_{u_0} w = \int_D u_0(y) \frac{\partial k}{\partial u}(x, y, u_0(y)) w(y) dy,$$

and  $J_{u_0} = K_{u_0} + \tilde{K}_{u_0}$  be the integral operator with kernel

$$j_{u_0}(x, y) = k(x, y, u_0(y)) + u_0(y) \frac{\partial k}{\partial u}(x, y, u_0(y)).$$

970 We have

$$(I + J_{u_0})^{-1} = I - J_{u_0} + J_{u_0}(I + J_{u_0})^{-1}J_{u_0},$$

so that when we write the linear bounded operator

$$A_{u_0}^{-1} = (I + J_{u_0})^{-1} : H^1(D) \rightarrow H^1(D),$$

as an integral operator

$$(I + J_{u_0})^{-1}v(x) = v + \int_D m_{u_0}(x, y)v(y)dy,$$

971 we have

$$\begin{aligned} & (I + J_{u_0})^{-1}v(x) \\ = & v(x) - J_{u_0}v(x) \\ & + \int_D \left( \int_D \left\{ j_{u_0}(x, y')j_{u_0}(y, y') + \left( \int_D j_{u_0}(x, y')m_{u_0}(y', x')j_{u_0}(x', y)dx' \right) \right\} dy' \right) v(y)dy \\ = & v(x) - \int_D \tilde{j}_{u_0}(x, y)v(y)dy, \end{aligned}$$

972 where

$$\tilde{j}_{u_0}(x, y) = -j_{u_0}(x, y) + \int_D (j_{u_0}(x, y')j_{u_0}(y, y')dy' + \int_D \int_D j_{u_0}(x, y')m_{u_0}(y', x')j_{u_0}(x', y)dx'dy').$$

973 This implies that the operator  $A_{u_0}^{-1} = (I + J_{u_0})^{-1}$  is a neural operator, too. Observe that

974  $\tilde{j}_{u_0}(x, y), \partial_x \tilde{j}_{u_0}(x, y) \in C(\overline{D} \times \overline{D})$ .

975 This proves Theorem 3. □
